1 **Title Page**

2 **Title:** A Novel DNA Chromatography Method to Distinguish *M. abscessus* Subspecies and  
3 Macrolide Susceptibility

4

5 **Authors**

6 Mitsunori Yoshida<sup>1</sup>, Sotaro Sano<sup>2</sup>, Jung-Yien Chien<sup>3, \*</sup>, Hanako Fukano<sup>1</sup>, Masato Suzuki<sup>4</sup>,  
7 Takanori Asakura<sup>1,5</sup>, Kozo Morimoto<sup>6</sup>, Yoshiro Murase<sup>7</sup>, Shigehiko Miyamoto<sup>2</sup>, Atsuyuki  
8 Kurashima<sup>6</sup>, Naoki Hasegawa<sup>5</sup>, Po-Ren Hsueh<sup>8</sup>, Satoshi Mitarai<sup>7</sup>, Manabu Ato<sup>1</sup>, Yoshihiko  
9 Hoshino<sup>1, \*</sup>

10 <sup>1</sup>Department of Mycobacteriology, Leprosy Research Center, National Institute of Infectious  
11 Diseases, <sup>2</sup>Medical Solutions Vehicle, Kaneka Co. Ltd., <sup>3</sup>Department of Internal Medicine,  
12 Pulmonary and Critical Care Medicine, National Taiwan University Hospital, <sup>4</sup>Antimicrobial  
13 Resistance Research Center, National Institute of Infectious Diseases, <sup>5</sup>Center for Infectious  
14 Diseases and Infection Control, School of Medicine, Keio University, <sup>6</sup>Respiratory Disease  
15 Center, Fukuji Hospital, Japan Anti-Tuberculosis Association, <sup>7</sup>Department of  
16 Mycobacterium Reference and Research, the Research Institute of Tuberculosis, Japan  
17 Anti-Tuberculosis Association, and <sup>8</sup>National Taiwan University College of Medicine.

18

19 \*Corresponding author:

20 Yoshihiko Hoshino (lead contact), M.D., Ph.D., Department of Mycobacteriology, Leprosy  
21 Research Center, National Institute of Infectious Diseases, 4-2-1 Aoba, Higashi-Murayama,  
22 Tokyo 189-0002, Japan. Phone: +81-42-391-8211. Fax: +81-42-394-9092. E-mail:  
23 [yhoshino@niid.go.jp](mailto:yhoshino@niid.go.jp)

24 Jung-Yien Chien, M.D., Ph.D., Department of Internal Medicine, Pulmonary and Critical  
25 Care Medicine, National Taiwan University Hospital, Phone; +886-2-2312-3456 ext. 62905,  
26 E-mail: [jychien@ntu.edu.tw](mailto:jychien@ntu.edu.tw)

27

28 **Author contributions**

29 Strain collection: JYC, PRH, KM, AK, NH, SMitara

30 Study conception: YH

31 Experimental design : MY, YH

32 Performed experiments : MY, SS, HF, MS, YM, SMiyam

33 Data analysis: MY, YH

34 Data interpretation: MY, YH

35 Figure production: MY

36 Manuscript writing: MY, YH

37 Manuscript editing: MY, SS, JYC, HF, PRH, TA, KM, NH, SMitara, MA, YH

38

39 **Funding**

40 This work was supported in part by grants from the Japan Agency for Medical Research and  
41 Development/Japan International Cooperation Agency to Y.H. (jp19fk0108043,  
42 jp19fk0108064, jp19fk0108075, and jp19jm0510004) and to M.A. (jp19fk0108043 and  
43 jp19fk0108049); by grants-in-aid from the Japan Society for Fostering Joint International  
44 Research (B) to Y.H. and M.Y. (jp19KK0217), for Early-Career Scientists to M.Y.  
45 (jp20K17205) and H.F. (jp18K15966), and for Scientific Research (C) to Y.H. (jp18K08312).  
46 The funders had no role in study design, data collection and analysis, decision to publish, or  
47 preparation of the manuscript.

48 **Running title:**

49 Chromatography for subspecies identification and detection of inducible MABC macrolide  
50 resistance

51 **Descriptor:** 11.5 Non-Tuberculous Mycobacterial Disease

52 **Manuscript word count:** 3499

53

54 This article has an online data supplement, which is accessible from the online table of  
55 contents for this issue at [www.atsjournals.org](http://www.atsjournals.org)

56

57 **Abstract**

58 **Rationale:**

59           The clinical impact of infection with *Mycobacterium abscessus* complex (MABC), a  
60 group of emerging non-tuberculosis mycobacteria (NTM), is increasing. *Mycobacterium*  
61 *abscessus* subsp. *abscessus/bolletii* frequently shows natural resistance to macrolide  
62 antibiotics, whereas *Mycobacterium abscessus* subsp. *massiliense* is generally susceptible.  
63 Therefore, rapid and accurate discrimination of macrolide-susceptible MABC subgroups is  
64 required for effective clinical decisions about macrolide treatments for MABC infection.

65 **Objectives:**

66           To develop a simple and rapid diagnostic that can identify MABC isolates showing  
67 macrolide susceptibility.

68 **Methods:**

69           Whole genome sequencing (WGS) was performed for 148 clinical or environmental  
70 MABC isolates from Japan to identify genetic markers that can discriminate three MABC  
71 subspecies and the macrolide-susceptible *erm(41)* T28C sequevar. Using the identified  
72 genetic markers, we established PCR based- or DNA chromatography-based assays.  
73 Validation testing was performed using MABC isolates from Taiwan.

74 **Measurements and Main Results:**

75           We identified unique sequence regions that could be used to differentiate the three  
76 subspecies. Our WGS-based phylogenetic analysis indicated that *M. abscessus* carrying the  
77 macrolide-susceptible *erm(41)* T28C sequevar were tightly clustered, and identified 11 genes  
78 that were significantly associated with the lineage for use as genetic markers. To detect these  
79 genetic markers and the *erm(41)* locus, we developed a DNA chromatography method that  
80 identified three subspecies, the *erm(41)* T28C sequevar and intact *erm(41)* for MABC in a  
81 single assay within one hour. The agreement rate between the DNA chromatography-based  
82 and WGS-based identification was 99.7%.

83   **Conclusions:**

84           We developed a novel, rapid and simple DNA chromatography method for  
85 identification of MABC macrolide susceptibility with high accuracy.

86

## 87 **Introduction**

88           The *Mycobacterium abscessus* (heterotypic synonym; *Mycobacteroides abscessus*)(1,  
89 2) complex (MABC) is a group of rapid-growing non-tuberculosis mycobacteria (NTM) that  
90 includes three subspecies: *M. abscessus* subsp. *abscessus* (*M. abscessus*), *M. abscessus* subsp.  
91 *massiliense* (*M. massiliense*), and *M. abscessus* subsp. *bolletii* (*M. bolletii*)(3, 4). MABC  
92 causes a range of clinical infections including chronic pulmonary disease even in  
93 immunocompetent persons, as well as postsurgical or traumatic infections and skin and soft  
94 tissue infections(4–8).

95           Among NTM infections, treatment outcomes for MABC infections are relatively  
96 worse and the in-hospital mortality rate can reach 16%(5, 9–13). These poor outcomes are due  
97 in part to the extensive antibiotic resistance of MABC(14). However, some MABC patients  
98 achieve good clinical outcomes with standard antibiotic regimens(15–17). Out of the three  
99 subspecies, *M. massiliense* is susceptible to macrolide antibiotics whereas *M. abscessus* and  
100 *M. bolletii* are resistant(18, 19). In the presence of macrolide antibiotics *M. abscessus* and *M.*  
101 *bolletii* exhibit inducible expression of erythromycin ribosomal methylase (*erm*)(41), which  
102 produces the Erm protein that reduces macrolide affinity for the ribosome exit tunnel(20–22).  
103 *M. massiliense* harbors a truncated *erm*(41) that produces inactive Erm(41). A T-to-C  
104 sequence variant (sequevar) at position 28 (T28C) of the *erm*(41) gene also results in  
105 production of an inactive enzyme, and does not result in inducible macrolide resistance of *M.*

106 *abscessus* and *M. bolletii*, which are generally macrolide resistant. These observations  
107 indicate that determination of subspecies and detection of intact *erm(41)* and the *erm(41)*  
108 T28C sequevar of MABC can inform prediction of clinical course and treatment outcome. In  
109 fact, the 2020 ATS/ERS/ESCMID/IDSA Clinical Practice Guideline strongly recommends a  
110 macrolide-containing multidrug treatment regimen for patients with MABC respiratory  
111 disease caused by strains without inducible macrolide resistance(23). Accordingly,  
112 discrimination of subspecies and identification of the *erm(41)* T28C sequevar is crucial.

113         Sequencing of single 16S rRNA or the RNA polymerase beta subunit (*rpoB*) cannot  
114 distinguish MABC subspecies because these loci are nearly identical(13, 24). Several studies  
115 have examined use of multi-locus sequencing typing (MLST) of housekeeping genes to  
116 separate subspecies(25–28). Advances in whole-genome sequencing (WGS) technology  
117 allowed MABC clinical isolates to be phylogenetically divided into three subspecies even at  
118 the whole genome level(29, 30). However, detection of the *erm(41)* T28C sequevar still  
119 requires sequencing of the entire *erm(41)* gene. Although MLST and/or WGS analyses allow  
120 discrimination of *erm* genes, these analyses are time-consuming and labor intensive in clinical  
121 practice. Thus, novel assays that are simple and rapid yet retain discriminatory power required  
122 to distinguish subspecies and to identify the *erm(41)* T28C sequevar are needed.

123         We previously reported a PCR-based method to differentiate MABC subspecies, but  
124 the capacity of this test was limited(31). In the present study, we analyzed WGS data for 148

125 MABC isolates from Japan to explore genetic markers associated with each subspecies and  
126 the *erm(41)* T28C sequevar. We propose a novel, rapid and easy-to-use DNA chromatography  
127 method that can identify all MABC subspecies as well as intact *erm(41)* and the *erm(41)*  
128 T28C sequevar in a single assay.

## 129 **Materials and methods**

130 For further details on the applied methods, *see* the online data supplement

### 131 **Bacterial isolates**

132 A total of 147 MABC clinical isolates and one environmental isolate (strain  
133 MabLRCB1) obtained for differential diagnosis at 19 hospitals (listed in Acknowledgments)  
134 in Japan were considered. Of the clinical isolates, 138 originated in the respiratory system, 8  
135 were isolated from skin lesions, and 1 strain was isolated from a blood sample (Table S1).  
136 Another 103 clinical isolates were obtained from Taiwan National University Hospital  
137 (Yoshida *et al.*, manuscript in preparation, Table S2). All strains were classified as MABC  
138 using a DDH Mycobacteria kit (Kyokuto Pharmaceutical Industrial, Tokyo, Japan) or by  
139 MALDI-TOF MS (Bruker Daltonics, Billerica, MA, USA). *M. abscessus* subsp. *abscessus*  
140 JCM 13569<sup>T</sup> (ATCC 19977), *M. abscessus* subsp. *massiliense* JCM 15300<sup>T</sup> and *M. abscessus*  
141 subsp. *bolletii* JCM 15297<sup>T</sup> (BD) type strains were obtained from the Japan Collection of  
142 Microorganisms of the Riken Bio-Resource Center (BRC-JCM; Ibaraki, Japan). All bacterial



143 strains/isolates were subcultured on 2% Ogawa egg slants or 7H10 agar plates supplemented  
144 with 10% OADC.

145 **PCR assays for discriminating *M. abscessus* subspecies and *erm*(41) T28C sequevar**

146 Single-PCR and multiplex PCR assays differentiating *M. abscessus*, *M. massiliense*,  
147 and *M. bolletii*, as well as the *erm*(41) T28C sequevar were conducted essentially as described  
148 previously(31) using newly constructed primers (*see* supplemental methods). Briefly,  
149 template DNA for PCR assays was isolated from one loopful of a mycobacterial colony  
150 grown on 7H10 medium that were resuspended in 300  $\mu$ l sterilized water, boiled at 95 °C for  
151 15 min and frozen at -30 °C. PCR amplification was performed using a Mastercycler gradient  
152 (Eppendorf) with 95 °C for 10 min; 30 cycles of 95 °C for 30 sec, 60 °C for 30 sec, and 72 °C  
153 for 40 sec; and extension at 72 °C for 10 min. Amplification to identify the *erm*(41) T28C  
154 sequevar was performed in the Mastercycler gradient using 95 °C for 10 min; 35 cycles of  
155 95 °C for 1 min, 62 °C for 1 min, and 72 °C for 1 min; and extension at 72 °C for 4 min. The  
156 PCR products were separated by 2% agarose gel electrophoresis and stained with ethidium  
157 bromide. The analytical limit of detection of the multiplex PCR assay was estimated by  
158 applying serial dilutions of DNA from *M. abscessus* ATCC19977, *M. massiliense* JCM 15300,  
159 and *M. bolletii* BD, in addition to several clinical MABC isolates. To assess the multiplex  
160 PCR assay specificity, several laboratory and clinical isolates were used including the *M.*  
161 *avium* complex (10 clinical isolates and one laboratory stain), *M. conceptionense*, *M.*

162 *fortuitum*, *M. gordonae*, *M. houstonense*, *M. kansasii*, *M. leprae* (3 clinical isolates and one  
163 laboratory stain), *M. lentiflavum*, *M. peregrinum*, *M. salmoniphilium*, *M. senegalense*, *M.*  
164 *shimoidei*, *M. smegmatis*, *M. szulgai*, *M. triplex*, *M. tuberculosis* (10 clinical isolates and one  
165 laboratory stain), and *M. xenopi*.

166 **DNA chromatography assay for discriminating MABC subspecies, intact *erm(41)* and**  
167 **the *erm(41)* T28C sequevar**

168 We applied a DNA chromatography method that was described elsewhere(32–34) to  
169 distinguish the MABC subspecies, intact *erm(41)* gene and the *erm(41)* T28C sequevar. This  
170 assay comprises PCR amplification and amplicon detection. All primers used in the assay are  
171 listed in Table 3. Briefly, primers with 5' tags, which have a domain that anneals to the target  
172 sequence and a tag domain that hybridizes to a single-stranded DNA probe on the chip or gold  
173 nanoparticle, were used for amplification. DNA extraction was performed essentially as  
174 described previously(6, 35). Total genomic DNA was extracted from frozen samples (as  
175 described above) using a Kaneka easy DNA extraction kit for *Mycobacteria* (KANEKA,  
176 Osaka, Japan). PCR was performed using a 20  $\mu$ l mixture containing 10  $\mu$ l PCR Mix  
177 (KANEKA, Osaka, Japan), 5  $\mu$ l primer mix (5 primer sets, 0.5  $\mu$ M each, Table 3), 1  $\mu$ l  
178 template DNA. Amplification was performed in a Life ECO thermocycler (BIOER Co. Ltd.,  
179 Hangzhou, China) with 25 °C for 5 min and 94 °C for 1 min, followed by 35 cycles of 94 °C  
180 for 5 sec, 65 °C for 10 sec, and 72 °C for 15 sec. An aliquot of the amplicons supplemented

181 with 70  $\mu$ l development buffer (KANEKA, Osaka, Japan) was applied to the detection strip  
182 sample pad (KANEKA, Osaka, Japan). After 10 min, blue lines were confirmed visually.  
183 Sensitivity and specificity tests for the DNA chromatography were performed as described  
184 above.

185

## 186 **Results**

### 187 **Subspecies identification based on core gene alignment of MABC isolates**

188 In the context of genome-based taxonomy, phylogeny involving concatenated core  
189 gene alignments is frequently used instead of 16S rRNA or *rpoB* gene sequences. We first  
190 examined whether a concatenated sequence of core genes, which are defined as homologous  
191 genes present in all strains examined, could distinguish the three MABC subspecies. Using a  
192 concatenated sequence of 2,957 core genes, the 148 MABC isolates could clearly be divided  
193 into three clades, with 92 (62.2%), 52 (35.1%), and 4 (2.7%) isolates identified as *M.*  
194 *abscessus*, *M. massiliense*, and *M. bolletii*, respectively (Fig. 1). This result is consistent with  
195 our previous report showing that multi-locus sequence typing (MLST) of *rpoB*, *hsp65*, and  
196 the ITS region could discriminate the three subspecies with 97.5% accuracy(31). Moreover,  
197 most isolates could be phylogenetically categorized in agreement with the core-locus  
198 phylogeny, although 4 (2.7%) were inconsistently categorized (Fig. S1A). Another group  
199 proposed a MLST scheme using seven housekeeping genes(28). We confirmed that this  
200 scheme could reliably discriminate the three MABC subspecies (Fig. S1B). We also

201 confirmed the subspecies identification by calculating the average nucleotide identity (ANI)  
202 for all MABC isolates (Fig. S2). The minimum ANI within each of the three subspecies was  
203 98.4 (within *M. abscessus*), 98.3 (within *M. massiliense*), and 99.1 (within *M. bolletii*), while  
204 the maximum ANI between subspecies was 97.5 (between *M. abscessus* and *M. massiliense*),  
205 97.7 (between *M. abscessus* and *M. bolletii*), and 97.0 (between *M. massiliense* and *M.*  
206 *bolletii*). These results indicated that phylogenetic analysis based on core-locus alignment  
207 indeed differentiated the three MABC subspecies and suggested that their subspecies  
208 boundaries were approximately 98% ANI.

#### 209 **Multiplex PCR assay for discriminating the three MABC subspecies**

210         Since WGS and/or MLST are not feasible for clinical settings, we sought to develop  
211 an alternative method to distinguish the three subspecies of MABC. We focused on “genetic  
212 markers” specific to each subspecies. We first aligned the complete genome sequences of type  
213 strains (ATCC 19977, JCM 15300, and BD) and draft genome sequences of 14 representative  
214 clinical isolates with progressiveMauve(36) and visually identified unique insertion/deletion  
215 (indel) regions in each of the three subspecies. We then designed three primer sets specific for  
216 sequences around the indel regions for size-based differentiation of PCR amplicons (Fig. 2A,  
217 Table 1). All primer sets could sharply discriminate reference strains and clinical isolates as  
218 evidenced by a single band on an agarose gel (Fig. 2B and Fig. S3). A sensitivity test showed  
219 the limit of detection was 100 pg DNA (Fig. S4). All other laboratory and clinical isolates of

220 NTM and *M. tuberculosis* tested were negative in this PCR assay (Fig. S5). We subsequently  
221 examined the primer set accuracy using the 148 MABC isolates, and confirmed that 91/92 *M.*  
222 *abscessus* (98.9%), 52/52 *M. massiliense* (100%), and 4/4 *M. bolletii* (100%) isolates were in  
223 agreement with the WGS-based subspecies identification, and the overall agreement rate  
224 between the PCR assay and WGS-based subspecies identification was 99.3% (95% CI: 96.3%  
225 to 100%). Results of our previous MLST(31) showed several sequence variants in the isolates,  
226 but the PCR assay could still differentiate between strains (Fig. 2B, Fig. S3). Notably,  
227 discordant sequencing type 4 (MabLRC28 and MabLRC86) and ds type 5 (MabLRC28) were  
228 distinguished as *M. abscessus* and *M. massiliense*, respectively, in accordance with  
229 WGS-based subspecies identification (Fig. 2). Although our previous multiplex PCR  
230 assay(31) could not distinguish all *M. bolletii* from others (Table S1), the present PCR assay  
231 could distinguish them. Moreover, the agreement rate with WGS-based subspecies  
232 identification was significantly higher ( $P < 0.01$ , two-proportion  $Z$  test) than that of the  
233 previous multiplex PCR assay (92.6%, 95% CI: 87.1% to 96.2%).

#### 234 **Multiplex PCR assay for discriminating the *erm*(41) T28C sequevar of MABC**

235 MABC have an *Erm*(41)-mediated inducible mechanism for resistance to macrolide  
236 antibiotics. Earlier studies demonstrated that a T-to-C substitution at position 28 in the *erm*  
237 gene results in macrolide antibiotic susceptibility(20, 37). Thus, discriminating isolates that  
238 carry the *erm*(41) T28C sequevar could guide antibiotic selection. To identify genetic markers

239 associated with the *erm*(41) T28C sequevar, we investigated the *erm*(41) genotype of the 148  
240 MABC isolates and their phylogenetic relationship (Fig. 3). Of the 92 *M. abscessus*, 17  
241 (18.5%) had the *erm*(41) T28C mutation and all but MabLRC70 were susceptible to  
242 clarithromycin (CAM) (Table S1). Notably, our phylogenetic analysis showed that these  
243 clinical isolates were tightly clustered (Fig. 3). Scoary analysis of lineage-associated genes  
244 indicated that 68 genes were significantly associated with the lineage to which all *M.*  
245 *abscessus* with the *erm*(41) T28C sequevar belonged (Bonferroni corrected *P*-value < 1E-8,  
246 sensitivity >80% and specificity > 80%, Table S4). In a whole-genome alignment, 11/68  
247 lineage-associated genes having the highest sensitivity and specificity were on a  
248 lineage-specific genetic locus (Fig. 4A). To determine whether these findings applied to other  
249 sample sets, we used public WGS data for MABC clinical isolates from two European  
250 countries(38, 39). A phylogenetic analysis based on the core-gene alignment indicated that the  
251 *M. abscessus erm*(41) T28C sequevar was also clustered and had the abovementioned genetic  
252 locus (Fig. S6). Among primer sets designed to amplify part of the genetic locus (Table 2, Fig.  
253 4A), one set detected only the *M. abscessus erm*(41) T28C sequevar with a single band (Fig.  
254 4B). Among the 148 MABC isolates, all 17 *M. abscessus erm*(41) T28C sequevars were  
255 positive in the PCR assay, whereas all other clinical isolates examined, except for MabMT19  
256 and MabLRC77, were negative (Table S1). The agreement between the multiplex PCR assay

257 results with WGS-based discrimination of the *erm*(41) T28C sequevar was 98.6% (95% CI:  
258 95.2% to 99.8%).

## 259 **DNA chromatography to discriminate subspecies and macrolide susceptibility of MABC**

260 Based on the results for the two PCR-based assays to discriminate MABC subspecies  
261 and the *erm*(41) T28C sequevar, we developed a simple DNA chromatography-based assay to  
262 discriminate MABC subspecies, intact *erm*(41), and the *erm*(41) T28C sequevar. We could  
263 discriminate subspecies and macrolide resistance in a single assay that in a sensitivity test had  
264 a detection limit of 10 pg DNA (Fig. 5), which was more sensitive than that of the multiplex  
265 PCR assay (Fig. S4, S7). All other laboratory and clinical isolates of NTM as well as *M.*  
266 *leprae* and *M. tuberculosis* that were tested were negative in the assay (Fig. S8 and data not  
267 shown). Using the 148 MABC isolates, we also examined the agreement between the DNA  
268 chromatography assay and WGS-based discrimination. All *M. abscessus* (n=92), *M.*  
269 *massiliense* (n=52), and *M. bolletii* (n=4) isolates were positive with T4, T5, and T3 bands  
270 respectively, while all other isolates identified as the remaining two subspecies were negative  
271 for these bands (Table 4, Table S1). All *M. abscessus* carrying the *erm*(41) T28C sequevar  
272 were positive, whereas other strains carrying wild-type T28 were negative for the T1 band,  
273 except for MabMT19 and MabLRC77 clinical isolates. All *M. abscessus* (n=92) and *M.*  
274 *bolletii* (n=4) strains carrying a intact *erm*(41) gene were positive for the T2 band but all *M.*  
275 *massiliense* (n=53) carrying a truncated *erm*(41) gene were negative, which is consistent with

276 WGS-based analyses (Table 4, Fig. 3). Overall agreement between the DNA chromatography  
277 results with WGS-based discrimination was 99.7% (95% CI: 99.0% to 100%). We also used  
278 the DNA chromatography method to analyze another sample set comprising 103 MABC  
279 clinical isolates from Taiwan for validation (Table S2). Using this method, within only a few  
280 hours we could determine that 49, 2, and 50 clinical isolates were *M. abscessus*, *M. bolletii*  
281 and *M. massiliense*, respectively; subspecies of TJMA-002 and TJMA-104 (1.9%) were not  
282 determined because these isolates showed multiple bands in subspecies identification (Table  
283 S2). Of 47 clinical isolates showing the T4 band, 12 also showed the T1 and T2 band, which  
284 corresponded to the *M. abscessus erm(41)* T28C sequevar, while 37 isolates showed only the  
285 T2 band corresponding to *M. abscessus* with an intact *erm(41)* gene. Two clinical isolates  
286 showing the T3 band also showed the T2 band, indicating that all *M. bolletii* had an intact  
287 *erm(41)* gene. Of 50 isolates showing the T5 band, 47 did not show the T2 band, indicating an  
288 *erm(41)* gene truncation. However, the remaining three isolates (TJMA-024, TJMA-041,  
289 TJMA-046) unexpectedly showed the T2 band. Using PCR amplification, TJMA-024 and  
290 TJMA-041 isolates had intact *erm(41)*, whereas TJMA-046 had both an intact and truncated  
291 *erm(41)* gene (data not shown). These results suggested that TJMA-024 and TJMA-041 were  
292 *M. massiliense* with an intact *erm(41)* gene and TJMA-041 was probably a mixed isolate of *M.*  
293 *abscessus* or *M. bolletii* having an intact *erm(41)* gene and *M. massiliense* with a truncated  
294 *erm(41)* gene.



295

296 **Discussion**

297 MABC is the most frequent clinical isolate of rapidly growing mycobacteria and an  
298 increased emergence has recently been observed in Japan and other developed  
299 countries(40–42). Commercially available DNA-DNA hybridization kits or MALDI-TOF MS  
300 are available in clinical laboratories in Japan and Taiwan to identify mycobacterium  
301 isolates(43, 44), but they cannot discriminate between either subspecies or the  
302 macrolide-susceptible *erm*(41) truncation and T28C polymorphism(45). Since macrolide  
303 susceptibility is crucial for effective treatment of MABC infection, here we developed a novel  
304 multiplex PCR and DNA chromatography method to identify subspecies and macrolide  
305 susceptibility. This assay allows rapid and accurate identification of inducible-macrolide  
306 resistance without need for sequencing of the *erm*(41) gene and/or 14-day drug susceptibility  
307 testing as recommended in the recent ATS/ERS/ESCMID/IDSA Clinical Practice  
308 Guideline(23). Our methodology is based on two findings about MABC genome architecture:  
309 (i) indel regions are robustly conserved at the subspecies level, and (ii) the  
310 macrolide-susceptible *M. abscessus* T28C sequevar is phylogenetically clustered and shares  
311 specific genetic loci. We thus used subspecies-associated and *erm*(41) T28C  
312 sequevar-associated genomic sequences as genetic markers to predict macrolide susceptibility.  
313 By combining detection of these genetic markers with simple DNA chromatography without  
314 DNA degeneration processes, our assay could discriminate both subspecies and their

315 macrolide susceptibility more quickly and easily than previously described MLST or WGS  
316 methods(43).

317 DNA chromatography produces clear visual results using only a thermocycler rather  
318 than more expensive and complex genome sequencers or MALDI-TOF MS instruments. The  
319 one hour turnaround time between DNA extraction to availability of results would  
320 substantially reduce the need for MLST or WGS to differentiate MABC subspecies and  
321 inducible macrolide susceptibility. Compared with the commercially available GenoType  
322 NTM-DR kit (Hain Lifesciences GmbH, Bruker Corporation, Nehren, Germany), the present  
323 DNA chromatography method is simpler (DNA chromatography vs. Southern blotting) and  
324 faster (1 hour vs. >4 hours). Furthermore, the accuracy of subspecies identification is higher  
325 (98%-100% vs. 92%-100%), and the ability to discriminate the *erm*(41) T28C sequevar is  
326 comparable(46–48), although the GenoType NTM-DR kit can detect additional acquired  
327 macrolide resistance and amikacin resistance.

328 Our DNA chromatography method had an analytical limit of detection of 10 pg DNA,  
329 which is substantially more sensitive than the GenoType NTM-DR kit (2 ng)(48). This  
330 amount of DNA theoretically corresponds to approximately  $2.2 \times 10^3$  MABC cells (DNA  
331 content/cell = genome size(bp)/ $0.978 \times 10^9 \approx 5.11 \times 10^{-3}$ )(49). There was no cross-reactivity  
332 with *M. leprae*, *M. tuberculosis*, MAC, or other representative NTM. These observations  
333 suggest that the DNA chromatography assay can identify MABC isolates directly from liquid

334 MGIT or solid Löwenstein-Jensen (LJ) or Ogawa cultures at early time points after  
335 decontamination of non-mycobacterial organisms. However, we have not yet tested this DNA  
336 chromatography method with highly contaminated nucleotide samples extracted directly from  
337 sputum or skin specimens. Future improvements to further increase the speed of this method  
338 will focus on direct detection from tissue specimens without culturing.

339         In the present work, we sought to detect associations between indel regions and the  
340 subspecies, and between genetic loci and the *erm*(41) T28C mutation. Our method  
341 successfully discriminated the subspecies and inducible macrolide susceptibility of almost all  
342 of the clinical isolates, but the few exceptions represent a limitation of the method that should  
343 be considered. MabMT37 yielded a 1,200 bp and 450 bp product for locus MAB\_2613 and  
344 MAB\_1655 (similar to *M. bolletii* strains) and a 330 bp product for MAB\_4665 (similar to *M.*  
345 *abscessus* strains). However, WGS-based phylogenetic and ANI analyses unambiguously  
346 categorized MabMT37 as *M. abscessus* (Table S1). We mapped raw sequence reads of  
347 MabMT37 to the *M. abscessus* ATCC 19977 genome and confirmed that there was no  
348 heterogeneity among the MAB2613, MAB\_1655, and MAB\_4665 loci (data not shown),  
349 suggesting that MabMT37 was likely a mono-clonal isolate. This result also suggested that,  
350 with respect to these genetic markers, MabMT37 had a chimeric genome structure between *M.*  
351 *abscessus* and *M. bolletii*. MabMT19 showed inducible clarithromycin resistance and had no  
352 mutation at *erm*(41) position 28, but it did cluster with other *erm*(41) T28C mutants and was

353 positive for the primer set MAB18036\_2558F and MAB18036\_2558R (Table S1), suggesting  
354 that MabMT19 had a chimeric genome between *M. abscessus* clades. These observations are  
355 supported by a previous genomic study describing an asymmetrical gene flow between  
356 MABC subspecies that resulted in a highly mosaic genome architecture(50). Since our assays  
357 do not directly analyze housekeeping genes or the *erm(41)* gene itself, our approach could be  
358 affected by genome architecture mosaicism arising via horizontal gene transfer. To address  
359 this limitation, accumulation of genomic information for MABC clinical isolates from across  
360 the world and successive adjustments of target genomic sequences will be important.

361 In conclusion, we developed a rapid, easy-to-use, and accurate assay to identify  
362 subspecies and macrolide susceptibility of MABC by analyzing WGS data of clinical isolates.  
363 This assay could be introduced into clinical laboratory practice to facilitate selection of  
364 effective treatments, development of assays having improved discrimination and diagnostic  
365 capacity, and acquisition of precise, nation-wide epidemiological information for MABC.  
366 Although the incidence of the macrolide-susceptible *erm(41)* T28C mutation is unknown, a  
367 population of *M. abscessus* in our Japanese sample set (18.5%) carried this mutation.  
368 Phylogenetic relationships between these mutants and global circulating clones of *M.*  
369 *abscessus*(30) should be addressed in future studies. Additional international corroboration  
370 studies based on epidemiological and population genomic approaches will be required to  
371 address these fundamental research questions.



373 **Acknowledgments**

374           The clinical isolates used in this study were sent from the hospitals and universities  
375 listed below. We appreciate the work of all of the clinicians at the following institutions who  
376 cared for patients infected with these mycobacteria: Hokkaido Social Insurance Hospital,  
377 Fukujuji Hospital Japan Anti-Tuberculosis Association (JATA), Saitama Medical University  
378 Hospital, National Hospital Organization (NHO) Tokyo Hospital, Showa University Fujigaoka  
379 Hospital, Keio University Hospital, National Defense Medical College Hospital, Kyorin  
380 University Hospital, Nagaya City University Hospital, NHO Minami-Kyoto Hospital, Kyoto  
381 Prefectural University of Medicine Hospital, Osaka City Northern-City Hospital, Osaka  
382 Hospital JATA, NHO Kinki-Chuo Chest Medical Center, NHO Matsue Medical Center,  
383 Kawasaki Medical School, NHO Higashi-Hiroshima Medical Center, Kyosai-Yoshijima  
384 Hospital, Kyushu University Hospital, and NHO Omuta Hospital. Computations were  
385 performed in part on the NIG supercomputer at the ROIS National Institute of Genetics. We  
386 thank Ms. Maki Okuda, Sayaka Kashiwagi, and Ginko Kaneda for their assistance.

387 **Declaration of interests**

388           M.Y., S.S., S. Miyam. and Y.H. are listed on a pending patent in Japan for the DNA  
389 chromatography methodology to distinguish MABC and identify macrolide susceptibility.

390 **Availability of data and materials**

391           All raw data are available by request to the corresponding authors.

393 **Figure legends.**

394 **Figure 1**

395 **Maximum likelihood core-gene phylogeny of 148 clinical and environmental isolates of**

396 **MABC.** Core genome alignment of 148 isolates and three reference strains (*M. abscessus*

397 *ATCC19977*, *M. massiliense* JCM 15300, and *M. bolletii* BD) of MABC was generated by

398 Roary(51). An alignment containing 62,196 variable positions was used with RAxML to

399 construct a maximum likelihood tree(52) having 300 bootstrap replicates. Bootstrap values >

400 90% for the major nodes are shown. Scale bar indicates the mean number of nucleotide

401 substitutions per site (SNP/site) on the respective branch. Samples are highlighted based on

402 inclusion in three major clusters corresponding to MABC subspecies.

403 **Figure 2**

404 **A. Example of indels among MABC subspecies.** A progressiveMauve alignment of the

405 three reference strains of MABC is shown. Each genome is laid out in a horizontal track and

406 white boxes indicate coding sequences annotated by dfast\_core(53). A colored similarity plot

407 is shown for each genome; the height is proportional to the sequence identity in that region. F

408 and R indicate primer position of MAB2613F and MAB2613R (listed in Table 1),

409 respectively, in each reference strain genome. **B. Representative multiplex PCR results for**

410 **reference strains and clinical isolates amplified with primer pair MAB2613F and**

411 **MAB2613R and primer pair MAB\_1655F and MAB\_1655R.** Types 1, 1a, 1b, 2, 2a, 2b, 2c,

412 2d, 3, 3a, 3b, 3c, ds4 and ds5 are the sub-groupings (sequevars) of the clinical isolates based  
413 on their sequences [Table 3 of the previous article(31)]. Numerals below the sequevars  
414 correspond to reference strains (ab<sup>T</sup>, ma<sup>T</sup>, or bo<sup>T</sup>) or the strain numbers of clinical isolates  
415 described in the previous article(31). Colored circles correspond to each member of MABC  
416 determined by WGS-based analysis. Lanes: M, DNA marker (100 bp ladder); ab<sup>T</sup>, *M.*  
417 *abscessus* (ATCC19977); ma, *M. massiliense* (JCM15300); bo, *M. bolletii* (BD). The PCR  
418 reaction products were electrophoresed on 2% agarose gels.

419 **Figure 3**

420 **Macrolide susceptibility-associated genotypes of 148 MABC isolates.** Maximum  
421 likelihood core-gene phylogeny of A) *M. abscessus*, B) *M. massiliense*, C) *M. bolletii*  
422 correspond to those depicted in **Figure 1**. The presence (black) and absence (gray) of  
423 macrolide resistance-associated mutations is indicated. The presence of a T-to-C substitution  
424 in position 28 or a truncation of the *erm(41)* gene, which are both associated with inducible  
425 resistance to macrolides, was detected. Substitutions or truncations with asterisks indicate  
426 non-synonymous mutations. The lineage to which all *M. abscessus erm(41)* T28C mutants  
427 belong is highlighted in magenta. The maximum likelihood trees, bootstrap values and scale  
428 bars correspond to those depicted **Figure 1**.

429 **Figure 4**



430 **A. Visualization of lineage-specific genomic loci.** A progressive Mauve alignment of three  
431 clinical isolates carrying the *erm(41)* T28C mutation and the reference strains is shown.  
432 Boxes indicate coding sequences annotated by *dfast\_core(53)*. Red and blue boxes indicate  
433 genes that are significantly associated with the lineage to which all *M. abscessus erm(41)*  
434 T28C mutants belong (see Methods and Table S3). F1, R1, F2, R2, F3, and R3 indicate  
435 primer position of MAB18036\_2551F, MAB18036\_2551R, MAB18036\_2558F,  
436 MAB18036\_2558R, MAB18036\_2560F, and MAB18036\_2560R (listed in Table 2),  
437 respectively, in each genome of the presented clinical isolates. A similarity plot for each  
438 genome is colored as described for **Figure 2A. B. Representative multiplex PCR results to**  
439 **identify macrolide susceptibility in MABC.** PCR was performed for the reference strains  
440 and clinical isolates were amplified with primer pairs MAB18036\_2558F and  
441 MAB18036\_2558R (listed in Table 2) and primer pair *ermF* (gaccggggccttcttcgtgatc) and  
442 *ermR* (agcttccccgcaccgattcca)(54). Colored circles correspond to each member of MABC  
443 determined by WGS-based analyses: red, *M. abscessus*; blue, *M. massiliense*; green, *M.*  
444 *bolletii*. The presence (+) or absence (-) of genotypes associated with the inducible macrolide  
445 resistance are shown. Lanes: M, DNA marker (100 bp ladder); ab<sup>T</sup>, *M. abscessus*  
446 (ATCC19977); ma<sup>T</sup>, *M. massiliense* (JCM15300); bo<sup>T</sup>, *M. bolletii* (BD). The PCR reaction  
447 products were electrophoresed on 2% agarose gels.

448 **Figure 5**

449 **DNA chromatography to differentiate subspecies and macrolide susceptibility of MABC.**

450 DNA chromatography results for reference strains (ab<sup>T</sup>, ma<sup>T</sup>, or bo<sup>T</sup>) or representative clinical  
451 isolates are shown. Colored circles above the strain names correspond to each member of  
452 MABC determined by WGS-based analyses: red, *M. abscessus*; blue, *M. massiliense*; green,  
453 *M. bolletii*, respectively. The presence (+) or absence (-) of genotypes associated with  
454 inducible macrolide resistance are shown. Bands: C, inner (negative) control; T1, *erm*(41)  
455 T28C polymorphism; T2, intact *erm*(41) genes; T3, *M. bolletii*; T4, *M. abscessus*; T5, *M.*  
456 *massiliense*.

457

458 **Table 1. Primers for discrimination of MABC subspecies.**

| Set | Primer name | Sequence (5'-3')          | Expected product size (bp) |                       |                    | Note                                                                                      |
|-----|-------------|---------------------------|----------------------------|-----------------------|--------------------|-------------------------------------------------------------------------------------------|
|     |             |                           | <i>M. abscessus</i>        | <i>M. massiliense</i> | <i>M. bolletii</i> |                                                                                           |
| 1   | MAB2613F    | gttcggatcgcgatggcgttgctg  | 503                        | 422                   | 1204               | ATCC 19977<br>(2653095 to 2653597),<br>C-term of MAB_2613<br>to downstream of<br>MAB_2613 |
|     | MAB2613R    | gggatgctgtgatcgaggtcggc   |                            |                       |                    |                                                                                           |
| 2   | MAB_1655F   | gagggcacgggagagaccaccggag | 652                        | 291                   | 452                | ATCC 19977<br>(1685112 to 1685763),<br>C-term of MAB_1655<br>to downstream of<br>MAB_1655 |
|     | MAB_1655R   | ccatttcYctatcYcgcccg      |                            |                       |                    |                                                                                           |
| 3   | MAB_4665F   | gatcccgttactagcgtgctttac  | 332                        | 538                   | 666                | ATCC 19977<br>(4747125 to 4747435),<br>intergenic region,<br>downstream of<br>MAB_4665c   |
|     | MAB_4665R   | tccggttcgactggcggccgga    |                            |                       |                    |                                                                                           |

459

460 **Table 2. Primers for discrimination of the *erm(41)* T28C sequevar.**

| Set | Primer name    | Sequence (5'-3')            | Expected product size<br>of <i>M. abscessus</i> | Note                                                                                              |
|-----|----------------|-----------------------------|-------------------------------------------------|---------------------------------------------------------------------------------------------------|
| 1   | MAB18036_2551F | ccgaatcgaatacgggccgggtaca   | 601                                             | Mab18036 (contig11: 13301 to 13902),<br>C-term of Mab18036_2551 to N-term of<br>Mab18036_2553     |
|     | MAB18036_2551R | cgctcgatactcacgccgccttca    |                                                 |                                                                                                   |
| 2   | MAB18036_2558F | caagaaccacatggataaacccgactg | 730                                             | Mab_18036 (contig11: 16597 to 17327),<br>Upstream of Mab18036_2558 to<br>Mab18036_2559            |
|     | MAB18036_2558R | catcggtcgggatcacttcagcggcag |                                                 |                                                                                                   |
| 3   | MAB18036_2560F | caggagcatcgtgcagatccgctgtcg | 820                                             | Mab18036 (contig11: 18219 to 19039),<br>middle of Mab18036_2560 to downstream<br>of Mab18036_2561 |
|     | MAB18036_2560R | accctgtttgccagcgcctaact     |                                                 |                                                                                                   |

461

462 **Table 3. DNA chromatography primers.**

| Set | Primer name | Sequence (5'-3')            | Target                 |
|-----|-------------|-----------------------------|------------------------|
| T1  | C28-1f      | tcctcggaatcggcactgtccgttg   | <i>erm</i> (41) T28C   |
|     | C28-1r      | tacagcagctcaacagtgcaccgaag  | polymorphism           |
| T2  | erm-4f      | cgtcgccgaatccgggtgttcgc     | intact <i>erm</i> (41) |
|     | erm-4r      | ctcggcaaaccgtgaacgaaggtgtc  |                        |
| T3  | MBO-22f     | cggtacgtcttacacgtcacgattgt  | <i>M. bolletii</i>     |
|     | MBO-22r     | acgaggtggataccgcgatcatt     |                        |
| T4  | MAB-25f     | atgttgaccgcaaggggttcgacac   | <i>M. abscessus</i>    |
|     | MAB-23r     | gtcaatac gatgaagccgacctcgg  |                        |
| T5  | MMA-20f     | tgctcgagagggaatgtcatccaccac | <i>M. massiliense</i>  |
|     | MMA-20r     | atatcacatcagccaaagccgcaag   |                        |

463

464 **Table 4. Accuracy of DNA chromatography test using MABC isolates from Japan (n =**

465 **148).**

|             | <i>erm</i> (41) C28    | <i>erm</i> (41) T28       | Agreement rate with WGS-based identification |
|-------------|------------------------|---------------------------|----------------------------------------------|
| T1 positive | 17                     | 2                         | 0.986 (95% CI: 0.952 to 0.998)               |
| T1 negative | 0                      | 129                       |                                              |
|             | <i>erm</i> (41) intact | <i>erm</i> (41) truncated | Agreement rate with WGS-based identification |
| T2 positive | 96                     | 0                         | 1.000 (95% CI: 0.975 to 1.000)               |
| T2 negative | 0                      | 52                        |                                              |
|             | <i>M. bolletii</i>     | not <i>M. bolletii</i>    | Agreement rate with WGS-based identification |
| T3 positive | 4                      | 0                         | 1.000 (95% CI: 0.975 to 1.000)               |
| T3 negative | 0                      | 144                       |                                              |
|             | <i>M. abscessus</i>    | not <i>M. abscessus</i>   | Agreement rate with WGS-based identification |

|             |                       |                           |                                                    |
|-------------|-----------------------|---------------------------|----------------------------------------------------|
| T4 positive | 92                    | 0                         | 1.000 (95% CI:                                     |
| T4 negative | 0                     | 56                        | 0.975 to 1.000)                                    |
|             | <i>M. massiliense</i> | not <i>M. massiliense</i> | Agreement rate<br>with WGS-based<br>identification |
| T5 positive | 52                    | 0                         | 1.000 (95% CI:                                     |
| T5 negative | 0                     | 96                        | 0.975 to 1.000)                                    |

466

467

468 **References**

- 469 1. Oren A, Garrity GM. List of new names and new combinations previously effectively,  
470 but not validly, published. *Int J Syst Evol Microbiol* 2016;66:2463–2466.
- 471 2. Gupta RS, Lo B, Son J. Phylogenomics and comparative genomic studies robustly  
472 support division of the genus *Mycobacterium* into an emended genus *Mycobacterium*  
473 and four novel genera. *Front Microbiol* 2018;9:67.
- 474 3. Adekambi T, Sassi M, Van Ingen J, Drancourt M. Reinstating *Mycobacterium*  
475 *massiliense* and *Mycobacterium bolletii* as species of the *Mycobacterium abscessus*  
476 complex. *Int J Syst Evol Microbiol* 2017;67:2726–2730.
- 477 4. Tortoli E, Kohl TA, Brown-Elliott BA, Trovato A, Cardoso-Leão S, Garcia MJ,  
478 Vasireddy S, Turenne CY, Griffith DE, Philley J V., Niemann S, Wallace RJ, Cirillo  
479 DM. *Mycobacterium abscessus*, a taxonomic puzzle. *Int J Syst Evol Microbiol*  
480 2018;68:467-469.
- 481 5. Griffith DE, Aksamit T, Brown-Elliott BA, Catanzaro A, Daley C, Gordin F, Holland  
482 SM, Horsburgh R, Huitt G, Iademarco MF, Iseman M, Olivier K, Ruoss S, Von Reyn  
483 CF, Wallace RJ, Winthrop K. An official ATS/IDSA statement: Diagnosis, treatment,  
484 and prevention of nontuberculous mycobacterial diseases. *Am J Respir Crit Care Med*  
485 2007;175:367-416.

- 486 6. Nakanaga K, Hoshino Y, Era Y, Matsumoto K, Kanazawa Y, Tomita A, Furuta M,  
487 Washizu M, Makino M, Ishii N. Multiple cases of cutaneous *Mycobacterium*  
488 *massiliense* infection in a “hot spa” in Japan. *J Clin Microbiol* 2011;49:613–617.
- 489 7. Shields RK, Clancy CJ, Minces LR, Shigemura N, Kwak EJ, Silveira FP,  
490 Abdel-Massih RC, Bhamra JK, Bermudez CA, Pilewski JM, Crespo M, Toyoda Y,  
491 Nguyen MH. Epidemiology and outcomes of deep surgical site infections following  
492 lung transplantation. *Am J Transplant* 2013;13:2137–2145.
- 493 8. Lee MR, Cheng A, Lee YC, Yang CY, Lai CC, Huang YT, Ho CC, Wang HC, Yu CJ,  
494 Hsueh PR. CNS infections caused by *Mycobacterium abscessus* complex: clinical  
495 features and antimicrobial susceptibilities of isolates. *J Antimicrob Chemother*  
496 2012;67:222–225.
- 497 9. Choi H, Kim SY, Kim DH, Huh HJ, Ki CS, Lee NY, Lee SH, Shin S, Shin SJ, Daley  
498 CL, Koh WJ. Clinical characteristics and treatment outcomes of patients with acquired  
499 macrolide-resistant *Mycobacterium abscessus* lung disease. *Antimicrob Agents*  
500 *Chemother* 2017;61:e01146–17.
- 501 10. Diel R, Ringshausen F, Richter E, Welker L, Schmitz J, Nienhaus A. Microbiological  
502 and clinical outcomes of treating non-*Mycobacterium avium* complex nontuberculous  
503 mycobacterial pulmonary disease: a systematic review and meta-analysis. *Chest*  
504 2017;152:120–142.



- 505 11. Griffith DE, Girard WM, Wallace RJ. Clinical features of pulmonary disease caused by  
506 rapidly growing mycobacteria. An analysis of 154 patients. *Am Rev Respir Dis* 1993;  
507 147:1271–8.
- 508 12. Sfeir M, Walsh M, Rosa R, Aragon L, Liu SY, Cleary T, Worley M, Frederick C,  
509 Abbo LM. *Mycobacterium abscessus* complex infections: A retrospective cohort Study.  
510 *Open Forum Infect Dis* 2018;5:ofy022.
- 511 13. Huang YC, Liu MF, Shen GH, Lin CF, Kao CC, Liu PY, Shi ZY. Clinical outcome of  
512 *Mycobacterium abscessus* infection and antimicrobial susceptibility testing. *J*  
513 *Microbiol Immunol Infect* 2010;43:401–406.
- 514 14. Nessar R, Cambau E, Reytrat JM, Murray A, Gicquel B. *Mycobacterium abscessus*: a  
515 new antibiotic nightmare. *J Antimicrob Chemother* 2012;67:810–818.
- 516 15. Jeon K, Kwon OJ, Nam YL, Kim BJ, Kook YH, Lee SH, Young KP, Chang KK, Koh  
517 WJ. Antibiotic treatment of *Mycobacterium abscessus* lung disease: A retrospective  
518 analysis of 65 patients. *Am J Respir Crit Care Med* 2009;180:896–902.
- 519 16. Lyu J, Jang HJ, Song JW, Choi CM, Oh YM, Lee S Do, Kim WS, Kim DS, Shim TS.  
520 Outcomes in patients with *Mycobacterium abscessus* pulmonary disease treated with  
521 long-term injectable drugs. *Respir Med* 2011;105:781–787.
- 522 17. Morimoto K, Nakagawa T, Asami T, Morino E, Fujiwara H, Hase I, Tsujimoto Y,  
523 Izumi K, Hayashi Y, Matsuda S, Murase Y, Yano R, Takasaki J, Betsuyaku T, Aono A,

- 524 Goto H, Nishimura T, Sasaki Y, Hoshino Y, Kurashima A, Ato M, Ogawa K,  
525 Hasegawa N, Mitarai S. Clinico-microbiological analysis of 121 patients with  
526 pulmonary *Mycobacteroides abscessus* complex disease in Japan – An NTM-JRC  
527 study with RIT. *Respir Med* 2018;145:14–20.
- 528 18. Koh WJ, Jeon K, Lee NY, Kim BJ, Kook YH, Lee SH, Park YK, Kim CK, Shin SJ,  
529 Huitt GA, Daley CL, Kwon OJ. Clinical significance of differentiation of  
530 *Mycobacterium massiliense* from *Mycobacterium abscessus*. *Am J Respir Crit Care*  
531 *Med* 2011;183:405–410.
- 532 19. Park J, Cho J, Lee C-H, Koo S, Yim J-J. Progression and treatment outcomes of lung  
533 disease caused by *Mycobacterium abscessus* and *Mycobacterium massiliense*. *Clin*  
534 *Infect Dis* 2017;64:301–308.
- 535 20. Nash KA, Brown-Elliott AB, Wallace RJ. A novel gene, *erm*(41), confers inducible  
536 macrolide resistance to clinical isolates of *Mycobacterium abscessus* but is absent from  
537 *Mycobacterium chelonae*. *Antimicrob Agents Chemother* 2009;53:1367–1376.
- 538 21. Luthra S, Rominski A, Sander P. The role of antibiotic-target-modifying and  
539 antibiotic-modifying enzymes in *Mycobacterium abscessus* drug resistance. *Front*  
540 *Microbiol* 2018;9:2179
- 541 22. Choi GE, Shin SJ, Won CJ, Min KN, Oh T, Hahn MY, Lee K, Lee SH, Daley CL, Kim  
542 S, Jeong BH, Jeon K, Koh WJ. Macrolide treatment for *Mycobacterium abscessus* and

- 543 *Mycobacterium massiliense* infection and inducible resistance. *Am J Respir Crit Care*  
544 *Med* 2012;186:917–925.
- 545 23. Daley CL, Iaccarino Jr JM, Lange C, Cambau E, Wallace RJ, Andrejak C, Böttger  
546 EC, Brozek J, Griffith DE, Guglielmetti L, Huitt GA, Knight SL, Leitman P, Marras  
547 TK, Olivier KN, Santin M, Stout JE, Tortoli E, van Ingen J, Wagner D, Winthrop KL.  
548 Treatment of nontuberculous mycobacterial pulmonary disease: An official  
549 ATS/ERS/ESCMID/IDSA clinical practice guideline: Executive summary. *Clin Infect*  
550 *Dis* 2020;71:e1-e36.
- 551 24. Macheras E, Roux AL, Ripoll F, Sivadon-Tardy V, Gutierrez C, Gaillard JL, Heym B.  
552 Inaccuracy of single-target sequencing for discriminating species of the  
553 *Mycobacterium abscessus* group. *J Clin Microbiol* 2009;47:2596–2600.
- 554 25. Macheras E, Roux AL, Bastian S, Leão SC, Palaci M, Sivadon-Tardy V, Gutierrez C,  
555 Richter E, Rüsç-Gerdes S, Pfyffer G, Bodmer T, Cambau E, Gaillard JL, Heym B.  
556 Multilocus sequence analysis and *rpoB* sequencing of *Mycobacterium abscessus* (*sensu*  
557 *lato*) strains. *J Clin Microbiol* 2011;49:491–499.
- 558 26. Adékambi T, Colson P, Drancourt M. *rpoB*-based identification of nonpigmented and  
559 late-pigmenting rapidly growing mycobacteria. *J Clin Microbiol* 2003;41:5699–5708.
- 560 27. Wuzinski M, Bak AK, Petkau A, Demczuk WHB, Soualhine H, Sharma MK. A  
561 multilocus sequence typing scheme for *Mycobacterium abscessus* complex

- 562 (MAB-multilocus sequence typing) using whole-genome sequencing data. *Int J*  
563 *Mycobacteriology* 2019;8:273–280.
- 564 28. Macheras E, Konjek J, Roux AL, Thiberge JM, Bastian S, Leão SC, Palaci M,  
565 Sivadon-Tardy V, Gutierrez C, Richter E, Rüsç-Gerdes S, Pfyffer GE, Bodmer T,  
566 Jarlier V, Cambau E, Brisse S, Caro V, Rastogi N, Gaillard JL, Heym B. Multilocus  
567 sequence typing scheme for the *Mycobacterium abscessus* complex. *Res Microbiol*  
568 2014;165:82–90.
- 569 29. Bryant JM, Grogono DM, Greaves D, Foweraker J, Roddick I, Inns T, Reacher M,  
570 Haworth CS, Curran MD, Harris SR, Peacock SJ, Parkhill J, Floto RA. Whole-genome  
571 sequencing to identify transmission of *Mycobacterium abscessus* between patients with  
572 cystic fibrosis: A retrospective cohort study. *Lancet* 2013;381:1551–1560.
- 573 30. Bryant JM, Grogono DM, Rodriguez-Rincon D, Everall I, Brown KP, Moreno P,  
574 Verma D, Hill E, Drijkoningen J, Gilligan P, Esther CR, Noone PG, Giddings O, Bell  
575 SC, Thomson R, Wainwright CE, Coulter C, Pandey S, Wood ME, Stockwell RE,  
576 Ramsay KA, Sherrard LJ, Kidd TJ, Jabbour N, Johnson GR, Knibbs LD, Morawska L,  
577 Sly PD, Jones A, et al. Emergence and spread of a humantransmissible  
578 multidrug-resistant nontuberculous mycobacterium. *Science* 2016;354:751–757.
- 579 31. Nakanaga K, Sekizuka T, Fukano H, Sakakibara Y, Takeuchi F, Wada S, Ishii N,  
580 Makino M, Kuroda M, Hoshino Y. Discrimination of *Mycobacterium abscessus* subsp.

- 581 *massiliense* from *Mycobacterium abscessus* subsp. *abscessus* in clinical isolates by  
582 multiplex PCR. *J Clin Microbiol* 2014;52:251–9.
- 583 32. Nagai S, Miyamoto S, Ino K, Tajimi S, Nishi H, Tomono J. Easy detection of multiple  
584 *Alexandrium* species using DNA chromatography chip. *Harmful Algae*  
585 2016;51:97–106.
- 586 33. Sano S, Miyamoto S, Kawamoto S. Rapid multiplex nucleic acid amplification test  
587 developed using paper chromatography chip and azobenzene-modified  
588 oligonucleotides. *J Biosci Bioeng* 2018;126:397–403.
- 589 34. Yamamuro T, Miyamoto S, Kitamura M, Muro T, Iwata YT, Segawa H, Kuwayama K,  
590 Tsujikawa K, Kanamori T, Inoue H. Development of simple and accurate detection  
591 systems for *Cannabis sativa* using DNA chromatography. *Forensic Sci Int*  
592 2018;291:68–75.
- 593 35. Tortoli E, Nanetti A, Piersimoni C, Cichero P, Farina C, Mucignat G, Scarparo C,  
594 Bartolini L, Valentini R, Nista D, Gesu G, Tosi CP, Crovatto M, Brusarosco G.  
595 Performance assessment of new multiplex probe assay for identification of  
596 mycobacteria. *J Clin Microbiol* 2001;39:1079–1084.
- 597 36. Darling ACE, Mau B, Blattner FR, Perna NT. Mauve: multiple alignment of conserved  
598 genomic sequence with rearrangements. *Genome Res* 2004;14:1394–403.

- 599 37. Brown-Elliott BA, Vasireddy S, Vasireddy R, Iakhiaeva E, Howard ST, Nash K,  
600 Parodi N, Strong A, Gee M, Smith T, Wallace RJ. Utility of sequencing the *erm*(41)  
601 gene in isolates of *Mycobacterium abscessus* subsp. *abscessus* with low and  
602 intermediate clarithromycin MICs. *J Clin Microbiol* 2015;53:1211–1215.
- 603 38. Tortoli E, Kohl TA, Brown-Elliott BA, Trovato A, Leão SC, Garcia MJ, Vasireddy S,  
604 Turenne CY, Griffith DE, Philley J V, Baldan R, Campana S, Cariani L, Colombo C,  
605 Taccetti G, Teri A, Niemann S, Wallace RJ, Cirillo DM. Emended description of  
606 *Mycobacterium abscessus*, *Mycobacterium abscessus* subsp. *abscessus* and  
607 *Mycobacterium abscessus* subsp. *bolletii* and designation of *Mycobacterium abscessus*  
608 subsp. *massiliense* comb. nov. *Int J Syst Evol Microbiol* 2016;66:4471–4479.
- 609 39. Lipworth S, Hough N, Leach L, Morgan M, Jeffery K, Andersson M, Robinson E,  
610 Grace Smith E, Crook D, Peto T, Walker T. Whole-genome sequencing for predicting  
611 clarithromycin resistance in *Mycobacterium abscessus*. *Antimicrob Agents Chemother*  
612 2019;63:e01204–18.
- 613 40. Namkoong H, Kurashima A, Morimoto K, Hoshino Y, Hasegawa N, Ato M, Mitarai S.  
614 Epidemiology of pulmonary nontuberculous Mycobacterial disease, Japan. *Emerg*  
615 *Infect Dis* 2016;22:1116–1117.
- 616 41. Wagner D, Van Ingen J, Van Der Laan R, Obradovic M. Non-tuberculous  
617 mycobacterial lung disease in patients with bronchiectasis: Perceived risk, severity and

- 618 guideline adherence in a European physician survey. *BMJ Open Respir Res*  
619 2020;7:e000498.
- 620 42. Zhang ZX, Cherng BPZ, Sng LH, Tan YE. Clinical and microbiological characteristics  
621 of non-tuberculous mycobacteria diseases in Singapore with a focus on pulmonary  
622 disease, 2012-2016. *BMC Infect Dis* 2019;19(1):436.
- 623 43. Hoshino Y, Suzuki K. Differential diagnostic assays for discriminating mycobacteria,  
624 especially for nontuberculous mycobacteria: what does the future hold? *Future*  
625 *Microbiol* 2015;10:205–16.
- 626 44. Carbonnelle E, Mesquita C, Bille E, Day N, Dauphin B, Beretti J-L, Ferroni A,  
627 Gutmann L, Nassif X. MALDI-TOF mass spectrometry tools for bacterial  
628 identification in clinical microbiology laboratory. *Clin Biochem* 2011;44:104–9.
- 629 45. Mase A, Yamaguchi F, Funaki T, Yamazaki Y, Shikama Y, Fukuchi K. PCR  
630 amplification of the *erm(41)* gene can be used to predict the sensitivity of  
631 *Mycobacterium abscessus* complex strains to clarithromycin. *Exp Ther Med*  
632 2019;19:945–955.
- 633 46. Kehrmann J, Kurt N, Rueger K, Bange FC, Buer J. GenoType NTM-DR for  
634 identifying *Mycobacterium abscessus* subspecies and determining molecular resistance.  
635 *J Clin Microbiol* 2016;54:1653–1655.

- 636 47. Huh HJ, Kim SY, Shim HJ, Kim DH, Yoo IY, Kang OK, Ki CS, Shin SY, Jhun BW,  
637 Shin SJ, Daley CL, Koh WJ, Yong Lee N. GenoType NTM-DR performance  
638 evaluation for identification of *Mycobacterium avium* complex and *Mycobacterium*  
639 *abscessus* and determination of clarithromycin and amikacin resistance. *J Clin*  
640 *Microbiol* 2019;57:e00516-19.
- 641 48. Mougari F, Loiseau J, Veziris N, Bernard C, Bercot B, Sougakoff W, Jarlier V,  
642 Raskine L, Cambau E, on behalf of the French National Reference Center for  
643 Mycobacteria. Evaluation of the new GenoType NTM-DR kit for the molecular  
644 detection of antimicrobial resistance in non-tuberculous mycobacteria. *J Antimicrob*  
645 *Chemother* 2017;72:1669–1677.
- 646 49. Dolezel J, Bartos J, Voglmayr H, Johann G. Nuclear DNA content and genome size of  
647 trout and human. *Cytometry* 2003;51A:127–128.
- 648 50. Sapriel G, Konjek J, Orgeur M, Bouri L, Frézal L, Roux A-L, Dumas E, Brosch R,  
649 Bouchier C, Brisse S, Vandenbergert M, Thiberge J-M, Caro V, Ngeow YF, Tan JL,  
650 Herrmann J-L, Gaillard J-L, Heym B, Wirth T. Genome-wide mosaicism within  
651 *Mycobacterium abscessus*: evolutionary and epidemiological implications. *BMC*  
652 *Genomics* 2016;17:118.



- 653 51. Page AJ, Cummins CA, Hunt M, Wong VK, Reuter S, Holden MTG, Fookes M,  
654 Falush D, Keane JA, Parkhill J. Roary: rapid large-scale prokaryote pan genome  
655 analysis. *Bioinformatics* 2015;31:3691–3693.
- 656 52. Stamatakis A. RAxML-VI-HPC: maximum likelihood-based phylogenetic analyses  
657 with thousands of taxa and mixed models. *Bioinformatics* 2006;22:2688–2690.
- 658 53. Tanizawa Y, Fujisawa T, Nakamura Y. DFAST: a flexible prokaryotic genome  
659 annotation pipeline for faster genome publication. *Bioinformatics* 2018;34:1037–1039.
- 660 54. Kim B-J, Kim G-N, Kim B-R, Shim T-S, Kook Y-H, Kim B-J. Phylogenetic analysis  
661 of *Mycobacterium massiliense* strains having recombinant *rpoB* gene laterally  
662 transferred from *Mycobacterium abscessus*. *PLoS One* 2017;12:e0179237.
- 663
- 664

665 **Figures**

666 **Figure 1.**

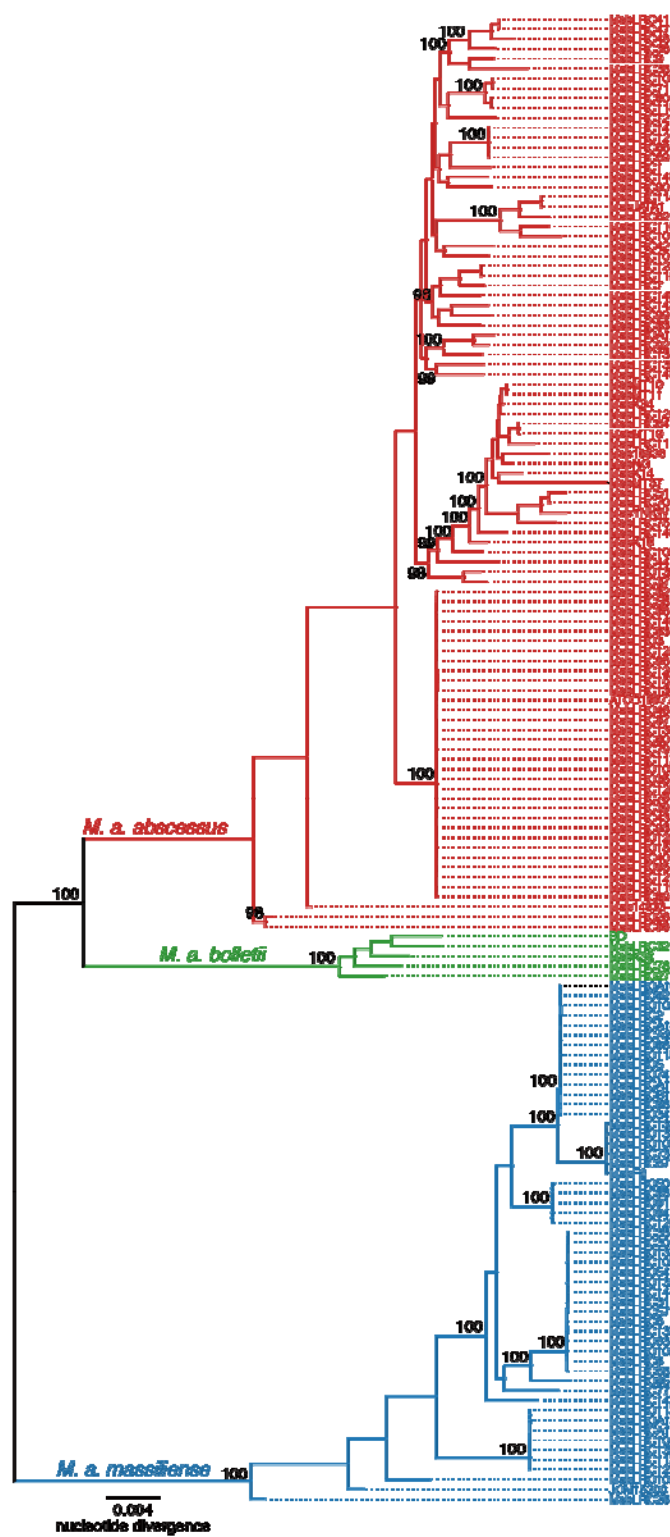

667

668

669 **Figure 2.**

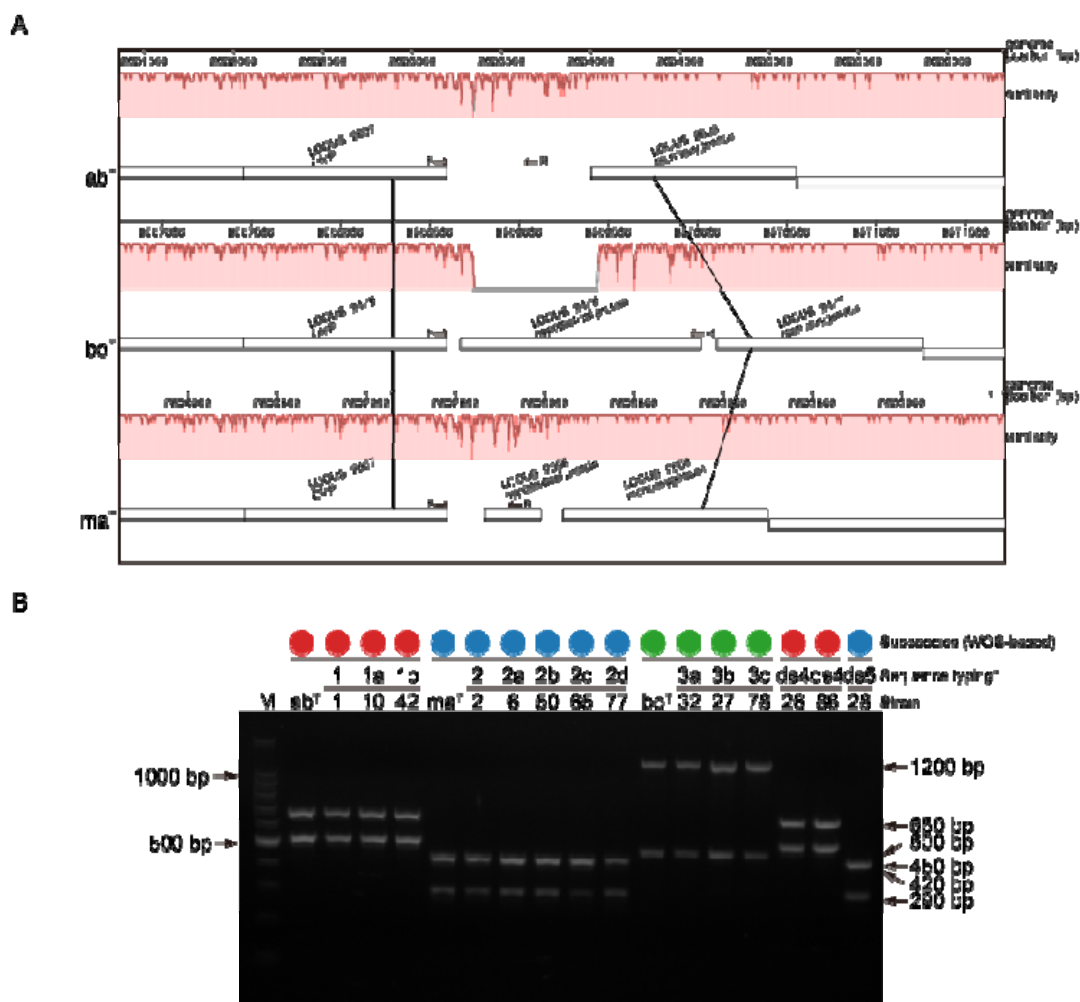

670

671

672 **Figure 3.**

A) *M. abscessus* (n=92)

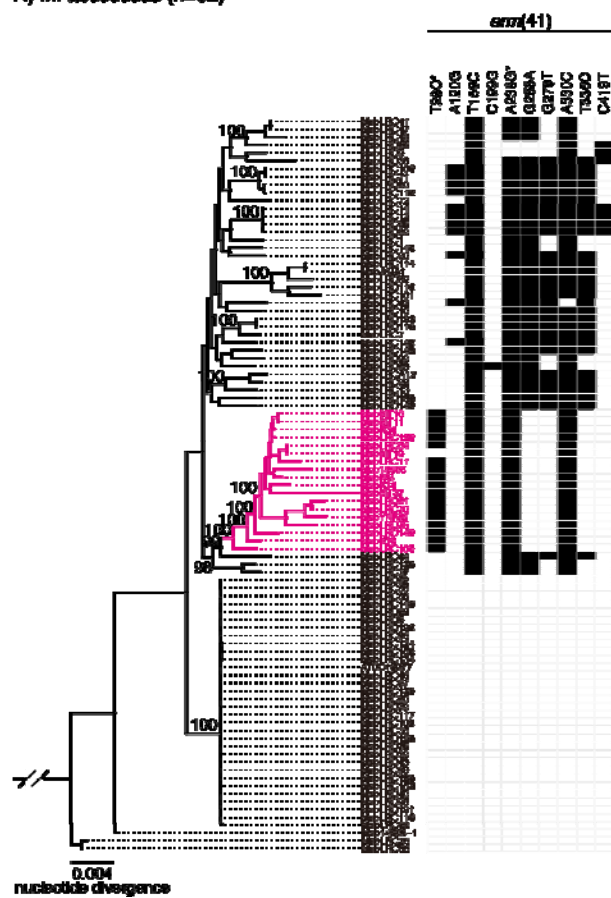

B) *M. massiliense* (n=52)

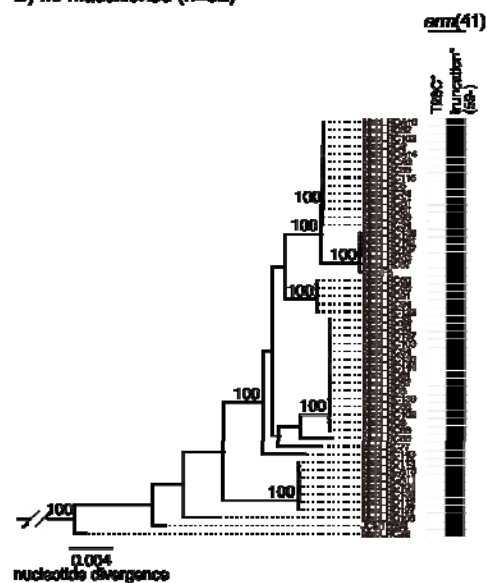

C) *M. bolletii* (n=4)

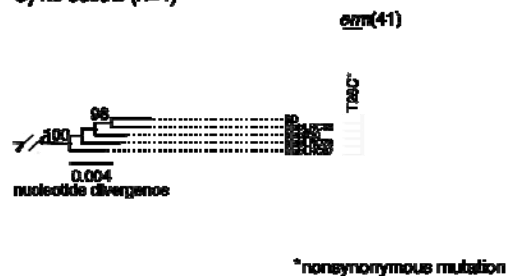

673

674

675 Figure 4.

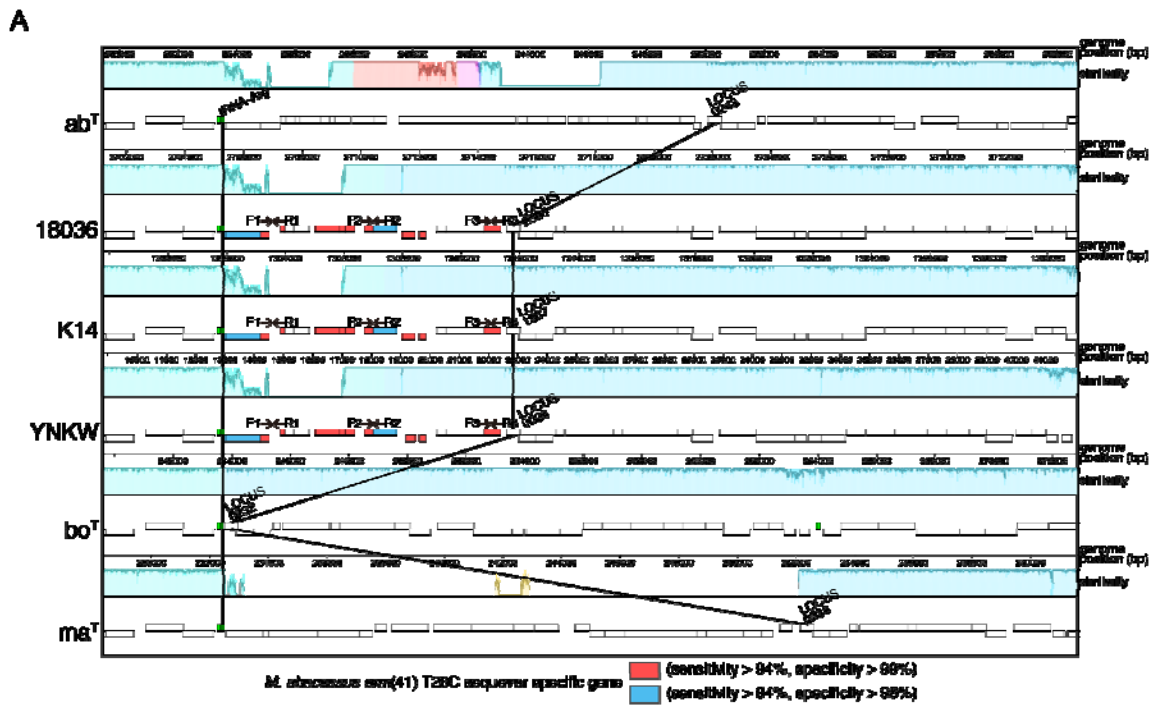

676

677

678

679 **Figure 5**

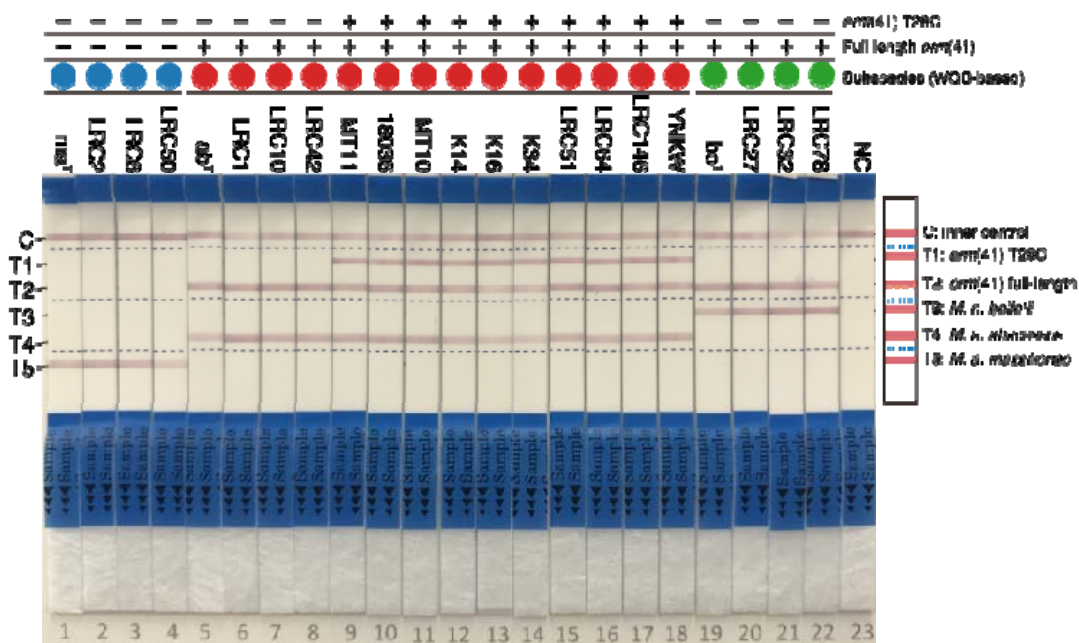

680

681

682 **Online Data Supplement**

683 **Title:** A Novel DNA Chromatography Method to Distinguish *M. abscessus* Subspecies and

684 Macrolide Susceptibility

685

686 **Authors**

687 Mitsunori Yoshida<sup>1</sup>, Sotaro Sano<sup>2</sup>, Jung-Yien Chien<sup>3, \*</sup>, Hanako Fukano<sup>1</sup>, Masato Suzuki<sup>4</sup>,

688 Takanori Asakura<sup>1,5</sup>, Kozo Morimoto<sup>6</sup>, Yoshiro Murase<sup>7</sup>, Shigehiko Miyamoto<sup>2</sup>, Atsuyuki

689 Kurashima<sup>6</sup>, Naoki Hasegawa<sup>5</sup>, Po-Ren Hsueh<sup>8</sup>, Satoshi Mitarai<sup>7</sup>, Manabu Ato<sup>1</sup>, Yoshihiko

690 Hoshino<sup>1, \*</sup>

691 <sup>1</sup>Department of Mycobacteriology, Leprosy Research Center, National Institute of Infectious

692 Diseases, <sup>2</sup>Medical Solutions Vehicle, Kaneka Co. Ltd., <sup>3</sup>Department of Internal Medicine,

693 Pulmonary and Critical Care Medicine, National Taiwan University Hospital, <sup>4</sup>Antimicrobial

694 Resistance Research Center, National Institute of Infectious Diseases, <sup>5</sup>Center for Infectious

695 Diseases and Infection Control, School of Medicine, Keio University, <sup>6</sup>Respiratory Disease

696 Center, Fukujuji Hospital, Japan Anti-Tuberculosis Association, <sup>7</sup>Department of

697 Mycobacterium Reference and Research, the Research Institute of Tuberculosis, Japan

698 Anti-Tuberculosis Association, and <sup>8</sup>National Taiwan University College of Medicine.

699

700 \*Corresponding author:

*Manuscript for bioRxiv*  
*M. Yoshida et al.*

701 Yoshihiko Hoshino (lead contact), M.D., Ph.D., Department of Mycobacteriology, Leprosy  
702 Research Center, National Institute of Infectious Diseases, 4-2-1 Aoba, Higashi-Murayama,  
703 Tokyo 189-0002, Japan. Phone: +81-42-391-8211. Fax: +81-42-394-9092. E-mail:  
704 [yhoshino@niid.go.jp](mailto:yhoshino@niid.go.jp)  
705 Jung-Yien Chien, M.D., Ph.D., Department of Internal Medicine, Pulmonary and Critical  
706 Care Medicine, National Taiwan University Hospital, Phone; +886-2-2312-3456 ext. 62905,  
707 E-mail: [jychien@ntu.edu.tw](mailto:jychien@ntu.edu.tw)  
708



709 **Supplemental Methods**

710 **DNA sequencing and genomic analysis**

711 Genomic DNA was extracted from each isolate with a NucleoSpin Plant II kit  
712 (MACHEREY-NAGEL, Düren, Germany) in accordance with the manufacturer's instructions,  
713 and was used for Nextera XT library construction and genome sequencing with Illumina  
714 NovaSeq or MiniSeq. All raw read data for the newly sequenced strains (148 strains isolated  
715 in Japan) in this study were deposited in the DNA Data Bank of Japan (DDBJ) and mirrored  
716 at the National Center for Biotechnology Information (NCBI) under BioProject accession  
717 number PRJDB10333.

718 The Illumina read data for each isolate were *de novo* assembled into contigs using a  
719 Shovill pipeline with default settings (<https://github.com/tseemann/shovill>). Table S3 lists the  
720 number of contigs, raw coverage and N50 value of each isolate. We combined the data with  
721 the complete genome sequence of *M. abscessus* ATCC19977(1), *M. massiliense* JCM  
722 15300(2), and *M. bolletii* BD(3). Phylogenetic analysis using a core gene set from the MABC  
723 isolates from Japan was next performed. We annotated each genome using DFAST-core ver.  
724 1.0.3 with the default setting(4) and the resulting gene annotations (GFF3 format) were used  
725 with Roary software and the "-cd 100" option(5) to compute core-gene alignments for the  
726 isolates. Using the 2,827,548 bp-long core-gene alignment carrying 62,196 SNP positions, we  
727 estimated a maximum-likelihood tree using RAxML ver. 8.2.12(6). We used the following

728 parameters that indicate the GTR + G4 model of DNA substitution with estimation of the  
729 shape parameter of the gamma distribution by maximizing the likelihood: -f a -m  
730 GTRGAMMA. Average nucleotide identity (ANI) values among all MABC isolates were  
731 calculated using fastANI with default settings(7). To identify single nucleotide  
732 polymorphisms (SNPs) in MABC isolates, we used MUMmer to conduct pairwise genome  
733 alignment between *M. abscessus* ATCC 19977 and one of the 150 strains including *M.*  
734 *bolletii* BD and *M. massiliense* JCM 15300(8). We then used an in-house Perl script to  
735 combine the alignments in a multiple whole-genome alignment, in which each position  
736 corresponded to that of the ATCC 19977 genome. The multiple whole-genome alignments  
737 were used for extracting and investigating the *erm*(41) genotype (MAB\_2297, nucleotide  
738 position: 2345955 to 2346476 in ATCC 19977<sup>T</sup>) of all strains using SeqKit(9).

739 **Construction of primers for discriminating MABC subspecies and the *erm*(41) T28C**  
740 **sequevar.**

741 To construct primer sets for discriminating MABC, we first aligned the complete  
742 genome sequences of *M. massiliense* JCM15300 and *M. bolletii* BD to the *M. abscessus*  
743 ATCC19977 reference genome and draft genomes of representative 14 clinical isolates using  
744 progressiveMauve and then visually identified unique insertion/deletion (indel) regions in  
745 each of the three subspecies. Three primer sets were designed around the indel regions to  
746 allow differentiation of the subspecies based on PCR amplicon size (Table 1). To construct

747 primer sets to determine the sub-clades of the *M. abscessus erm(41)* T28C sequevar, we  
748 identified accessory genes that were significantly associated with the lineage using  
749 Scoary(10). Primer sets were designed around the accessory genes used as genetic markers of  
750 the lineage (Table 2).

#### 751 **Statistical analysis**

752 Statistical analyses were performed with R software ([www.r-project.org](http://www.r-project.org)). The R  
753 function `binom.test()` was used to assess 95% confidence intervals (95% CIs) of agreement  
754 rates between the multiplex PCR/DNA chromatography and WGS-based identification.  
755 Differences in accuracy between the multiplex PCR developed in this study and our previous  
756 multiplex PCR were statistically assessed using the R function `prop.test()`.

#### 757 **Ethics Statement**

758 This study was reviewed and approved by the medical research ethics committee of the  
759 National Institute of Infectious Diseases for inclusion of human subjects (#1004 and #1005 for  
760 the Japanese and Taiwanese, respectively).

761

762 **Supplemental Figure Legends.**

763 **Figure S1**

764 **Maximum-likelihood trees constructed from concatenated sequences. A.** Concatenated  
765 sequences of *rpoB* (409-bp), *hsp65* (409-bp), and ITS (298-bp) fragments to differentiate  
766 subspecies of MABC as previously described (11). Samples having results that differed from  
767 those for WGS-based analyses are highlighted. **B.** Concatenated sequences of 7 housekeeping  
768 genes [*argH* (480 bp), *cya* (510 bp), *glpK* (534 bp), *gnd* (480 bp), *murC* (537 bp), *pgm* (495  
769 bp), *pta* (486 bp), and *purH* (549 bp)] to differentiate subspecies of MABC as described  
770 previously(12). Sequences were extracted from the whole-genome alignment of each isolate  
771 to the reference strain *M. abscessus* ATCC 19977 (see Supplemental Methods). The trees for  
772 all isolates (n=148) and three reference strains (*M. abscessus* ATCC 19977, *M. massiliense*  
773 JCM 15300, and *M. bolletii* BD) were computed using MEGA ver. 10.1.7 with 500 bootstrap  
774 replicates. The bootstrap support values (%) are indicated for each node. Colored circles  
775 correspond to each member of MABC determined by WGS-based analyses (**Fig. 1** and **Fig.**  
776 **S2**): red, *M. abscessus*; blue, *M. massiliense*; green, *M. bolletii*, respectively.

777 **Figure S2**

778 **Average nucleotide identity matrix of MABC isolates.** Average nucleotide identities  
779 among 148 isolates and three reference strains (*M. abscessus* ATCC 19977, *M. massiliense*  
780 JCM 15300, and *M. bolletii* BD) were measured for all strain pairs using fast ANI(7). Red and  
781 blue boxes indicate ANI values higher or lower than 98% for corresponding strain pairs. A

782 boxplot indicates the distribution of ANI values within or between subspecies of MABC. The  
783 maximum likelihood tree corresponds to that depicted in **Fig. 1**.

#### 784 **Figure S3**

785 **Representative single PCR to differentiate MABC subspecies.** PCR was performed with  
786 primer pair **A.** MAB2613F and MAB2613R, **B.** MAB\_1655F and MAB\_1655R, and **C.**  
787 MAB\_4665F and MAB\_4665R. Types 1, 1a, 1b, 2, 2a, 2b, 2c, 2d, 3, 3a, 3b, 3c, 4 and 5 are  
788 the sub-groupings (sequevars) of the clinical isolates based on their sequences [Table 3 of the  
789 previous article]. Numbers below the sequevars correspond to reference strains ( $ab^T$ ,  $ma^T$ , or  
790  $bo^T$ ) or strain numbers of clinical isolates described in the previous article(11). Lanes: M,  
791 DNA marker (100 bp ladder);  $ab^T$ , *M. abscessus* ATCC19977);  $ma^T$ , *M. massiliense*  
792 (JCM15300);  $bo^T$ , *M. bolletii* (JCM15297). Colored circles correspond to each member of  
793 MABC determined by WGS-based analysis (**Fig. 1** and **Fig. S2**): red, *M. abscessus*; blue, *M.*  
794 *massiliense*; green, *M. bolletii*, respectively. The PCR reaction products were electrophoresed  
795 on 2% agarose gels.

#### 796 **Figure S4**

797 **Sensitivity test of PCR primers to differentiate MABC subspecies.** The sensitivity of  
798 primers to differentiate MABC subspecies was tested using 10  $\mu$ g undiluted or ten-fold  
799 diluted DNA from the three MABC reference strains. Primer set 1, primer pair MAB2613F  
800 and MAB2613R; Primer set 2, primer pair MAB\_1655F and MAB\_1655R. Lanes: M, DNA

801 marker (100 bp ladder); ab<sup>T</sup>, *M. abscessus* ATCC19977); ma<sup>T</sup>, *M. massiliense* (JCM15300);  
802 bo<sup>T</sup>, *M. bolletii* (JCM15297). The PCR reaction products were electrophoresed on 2% agarose  
803 gels.

#### 804 **Figure S5**

805 **Specificity test of PCR primers to differentiate subspecies of MABC.** The tests were  
806 performed with MAB2613F/MAB2613R (Primer set 1), MAB2613F/MAB2613R (Primer set  
807 2), and MAB\_1655F/MAB\_1655R (Primer set 3), with 4 ng of each indicated mycobacterial  
808 genomic DNA. The PCR reaction products were electrophoresed on 2% agarose gels. M,  
809 DNA marker (100 bp ladder). All isolates other than the *M. abscessus* complex were negative  
810 in this assay [Only those representative data for rapid-growing NTM (ch<sup>T</sup>, *M. chelonae*<sup>T</sup>; co<sup>T</sup>,  
811 *M. conceptionense*<sup>T</sup>; fo<sup>T</sup>; *M. fortuitum*<sup>T</sup>; ho<sup>T</sup>, *M. houstonense*<sup>T</sup>; sa<sup>T</sup>, *M. salmoniphilium*<sup>T</sup>; se<sup>T</sup>,  
812 *M. senegalense*<sup>T</sup>; sm<sup>T</sup>, *M. smegmatis*<sup>T</sup>) are shown in this figure ] .

#### 813 **Figure S6**

814 **Maximum likelihood core-gene phylogeny of MABC from Japan, UK and Italy.**  
815 Core-genome alignment of 120 isolates and three reference strains (*M. abscessus*  
816 ATCC19977, *M. massiliense* JCM 15300, and *M. bolletii* BD) of MABC were computed  
817 using Roary(5). The alignment containing 2,508 genes and 45,226 variable positions was used  
818 to construct a maximum likelihood tree using RAxML(6) with 300 bootstrap replicates.  
819 Bootstrap values > 90% for the major nodes are shown. The scale bar represents the mean

820 number of nucleotide substitutions per site (SNP/site) on the respective branch. Samples are  
821 highlighted based on inclusion in three major clusters corresponding to subspecies of MABC.  
822 Colored boxes indicate countries where the corresponding strain was isolated: red, Japan; blue,  
823 UK; green, Italy; gray, reference strain. This tree is also annotated for the presence (black)  
824 and absence (light gray) of macrolide resistance-associated mutations. These mutations  
825 include the presence of a T-to-C substitution in position 28 or a truncation of the *erm(41)*  
826 gene that are associated with inducible resistance to macrolides; the presence of mutations at  
827 *rml* position 2269 to 2271 confers acquired macrolide resistance. Substitutions or truncation  
828 with asterisks indicate non-synonymous mutations. The lineage to which all *M. abscessus*  
829 *erm(41)* T28C mutants belong is highlighted in magenta. **(inset) Visualization of**  
830 **lineage-specific genomic loci.** A progressiveMauve alignment of three clinical isolates  
831 carrying the *erm(41)* T28C mutation and the reference strains is shown. Red boxes indicate  
832 genomic regions specific to the lineage to which all *M. abscessus erm(41)* T28C mutants  
833 belong.

#### 834 **Figure S7**

835 **Sensitivity of the DNA chromatography method to differentiate subspecies and**  
836 **macrolide susceptibility resistance of MABC.** A sensitivity test was performed with 1 ng  
837 undiluted or ten-fold diluted DNA from three reference strains and a clinical isolate carrying  
838 the *erm(41)* T28C polymorphism. Numbers correspond to type strains of MABC (ab<sup>T</sup>, ma<sup>T</sup>, or

839 bo<sup>T</sup>) or the strain names of the clinical isolates (Mab18036). Bands: C, inner (negative)

840 control; T1, *erm*(41) T28C polymorphism; T2, intact *erm*(41) genes; T3, *M. bolletii*; T4, *M.*

841 *abscessus*; T5, *M. massiliense*.

842 **Figure S8**

843 **Specificity of the DNA chromatography method to differentiate subspecies and**

844 **macrolide susceptibility of MABC.** Specificity tests were performed using 4 ng of each

845 indicated mycobacterial genomic DNA. Several laboratory and clinical isolates were tested in

846 this assay. All isolates other than the *M. abscessus* complex were negative in this assay [Only

847 representative data for NTM (ch<sup>T</sup>, *M. chelonae*<sup>T</sup>; co<sup>T</sup>, *M. conceptionense*<sup>T</sup>; fo<sup>T</sup>, *M. fortuitum*<sup>T</sup>,

848 go<sup>T</sup>, *M. gordonae*<sup>T</sup>; ka<sup>T</sup>, *M. kansasii*<sup>T</sup>; sa<sup>T</sup>, *M. salmoniphilium*<sup>T</sup>; se<sup>T</sup>, *M. senegalense*<sup>T</sup>; sm<sup>T</sup>, *M.*

849 *smegmatis*<sup>T</sup>) and *M. tuberculosis* and *M. avium* clinical isolates are shown in this figure ] .

850



851 Supplementary Tables

**Table S1 Bacterial strains and overall results of this study.**

| Strain                             | Isolated from   | WGS-based subspecies identification | Previous multiplex PCR (Nakanaga et al., 2014) | MAB2 613F-R | MAB_1 655F-R | MAB_4 665F-R | MAB1803 6_2558F-R | DNA chromatography | <i>erm</i> (41) positive | <i>erm</i> (41) positive | <i>erm</i> (41) deletion | CA MIC early (3-5 days) | CA MIC late (day 14) | Reference                |
|------------------------------------|-----------------|-------------------------------------|------------------------------------------------|-------------|--------------|--------------|-------------------|--------------------|--------------------------|--------------------------|--------------------------|-------------------------|----------------------|--------------------------|
| <i>M. abscessus</i> <sup>T</sup>   | NA <sup>a</sup> | ABS <sup>b</sup>                    | ABS (150bp/900bp)                              | 500bp       | 650bp        | 330bp        | negative          | T2/T4              | T                        | No                       | No                       | ≤0.25 (S)               | >32 (R)              | Moore and Frerichs, 1953 |
| <i>M. massiliense</i> <sup>T</sup> | NA              | MAS <sup>c</sup>                    | MAS (650bp/300bp)                              | 420bp       | 290bp        | 540bp        | negative          | T5                 | T                        | Yes                      | Yes                      | 0.5 (S)                 | 2 (S)                | Adékambi et al., 2006    |
| <i>M. bolletii</i> <sup>T</sup>    | NA              | BOL <sup>d</sup>                    | ABS (150bp/900bp)                              | 1200bp      | 450bp        | 670bp        | negative          | T2/T3              | T                        | No                       | No                       | 0.5 (S)                 | >32 (R)              | Adékambi et al., 2006    |
| Mab14033-1                         | Respiratory     | ABS                                 | ND <sup>e</sup> (150bp/300bp)                  | 500bp       | 650bp        | 330bp        | negative          | T2/T4              | T                        | No                       | No                       | ≤0.25 (S)               | 2 (S)                | This study               |
| Mab18036                           | Respiratory     | ABS                                 | ND (150bp/300bp)                               | 500bp       | 650bp        | 330bp        | positive          | T1/T2/T4           | C                        | No                       | No                       | ≤0.25 (S)               | ≤0.25 (S)            | This study               |
| MabF6                              | Respiratory     | MAS                                 | MAS (650bp/300bp)                              | 420bp       | 290bp        | 540bp        | negative          | T5                 | T                        | Yes                      | Yes                      | 8 (R)                   | >32 (R)              | This study               |
| MabJATA1                           | Respiratory     | ABS                                 | ABS (150bp/900bp)                              | 500bp       | 650bp        | 330bp        | negative          | T2/T4              | T                        | No                       | No                       | ≤0.25 (S)               | 0.5 (S)              | This study               |
| MabK14                             | Respiratory     | ABS                                 | ABS (150bp/900bp)                              | 500bp       | 650bp        | 330bp        | positive          | T1/T2/T4           | C                        | No                       | No                       | ≤0.25 (S)               | 2 (S)                | This study               |

|           |             |     |                              |        |       |       |          |          |   |     |     |                 |         |                       |
|-----------|-------------|-----|------------------------------|--------|-------|-------|----------|----------|---|-----|-----|-----------------|---------|-----------------------|
| MabK16    | Respiratory | ABS | 0bp)<br>ABS<br>(150bp/900bp) | 500bp  | 650bp | 330bp | positive | T1/T2/T4 | C | No  | No  | $\leq 0.25$ (S) | 2 (S)   | This study            |
| MabK30    | Respiratory | BOL | ABS<br>(150bp/900bp)         | 1200bp | 450bp | 670bp | negative | T2/T3    | T | No  | No  | $\leq 0.25$ (S) | >32 (R) | This study            |
| MabK34    | Respiratory | ABS | ABS<br>(150bp/900bp)         | 500bp  | 650bp | 330bp | positive | T1/T2/T4 | C | No  | No  | $\leq 0.25$ (S) | 1 (S)   | This study            |
| MabLRC1   | Respiratory | ABS | ABS<br>(150bp/900bp)         | 500bp  | 650bp | 330bp | negative | T2/T4    | T | No  | No  | $\leq 0.25$ (S) | >32 (R) | Nakanaga et al., 2014 |
| MabLRC10  | Respiratory | ABS | ABS<br>(150bp/900bp)         | 500bp  | 650bp | 330bp | negative | T2/T4    | T | No  | No  | 0.5 (S)         | >32 (R) | Nakanaga et al., 2014 |
| MabLRC100 | Respiratory | ABS | ABS<br>(150bp/900bp)         | 500bp  | 650bp | 330bp | negative | T2/T4    | T | No  | No  | 0.5 (S)         | >32 (R) | Nakanaga et al., 2014 |
| MabLRC101 | Respiratory | ABS | ABS<br>(150bp/900bp)         | 500bp  | 650bp | 330bp | negative | T2/T4    | T | No  | No  | $\leq 0.25$ (S) | >32 (R) | Nakanaga et al., 2014 |
| MabLRC102 | Respiratory | MAS | MAS<br>(650bp/300bp)         | 420bp  | 290bp | 540bp | negative | T5       | T | Yes | Yes | $\leq 0.25$ (S) | 2 (S)   | Nakanaga et al., 2014 |
| MabLRC103 | Respiratory | MAS | MAS<br>(650bp/300bp)         | 420bp  | 290bp | 540bp | negative | T5       | T | Yes | Yes | $\leq 0.25$ (S) | 0.5 (S) | Nakanaga et al., 2014 |
| MabLRC104 | Respiratory | MAS | MAS<br>(650bp/300bp)         | 420bp  | 290bp | 540bp | negative | T5       | T | Yes | Yes | $\leq 0.25$ (S) | 2 (S)   | Nakanaga et al., 2014 |
| MabLRC105 | Respiratory | ABS | ABS<br>(150bp/900bp)         | 500bp  | 650bp | 330bp | positive | T1/T2/T4 | C | No  | No  | $\leq 0.25$ (S) | 1 (S)   | Nakanaga et al., 2014 |

|            |             |     |                  |       |       |       |          |          |   |     |     |                 |         |                       |
|------------|-------------|-----|------------------|-------|-------|-------|----------|----------|---|-----|-----|-----------------|---------|-----------------------|
| MabLR C106 | Respiratory | ABS | ABS (150bp/90bp) | 500bp | 650bp | 330bp | negative | T2/T4    | T | No  | No  | 32 (R)          | >32 (R) | Nakanaga et al., 2014 |
| MabLR C107 | Respiratory | MAS | MAS (650bp/30bp) | 420bp | 290bp | 540bp | negative | T5       | T | Yes | Yes | $\leq 0.25$ (S) | 8 (R)   | Nakanaga et al., 2014 |
| MabLR C108 | Respiratory | MAS | MAS (650bp/30bp) | 420bp | 290bp | 540bp | negative | T5       | T | Yes | Yes | $\leq 0.25$ (S) | 1 (S)   | Nakanaga et al., 2014 |
| MabLR C109 | Respiratory | MAS | MAS (650bp/30bp) | 420bp | 290bp | 540bp | negative | T5       | T | Yes | Yes | $\leq 0.25$ (S) | 0.5 (S) | Nakanaga et al., 2014 |
| MabLR C11  | Respiratory | ABS | ABS (150bp/90bp) | 500bp | 650bp | 330bp | positive | T1/T2/T4 | C | No  | No  | $\leq 0.25$ (S) | 1 (S)   | Nakanaga et al., 2014 |
| MabLR C110 | Respiratory | ABS | ABS (150bp/90bp) | 500bp | 650bp | 330bp | negative | T2/T4    | T | No  | No  | 0.5 (S)         | >32 (R) | Nakanaga et al., 2014 |
| MabLR C112 | Blood       | MAS | MAS (650bp/30bp) | 420bp | 290bp | 540bp | negative | T5       | T | Yes | Yes | $\leq 0.25$ (S) | 2 (S)   | This study            |
| MabLR C113 | Respiratory | MAS | MAS (650bp/30bp) | 420bp | 290bp | 540bp | negative | T5       | T | Yes | Yes | $\leq 0.25$ (S) | 0.5 (S) | This study            |
| MabLR C114 | Respiratory | ABS | ABS (150bp/90bp) | 500bp | 650bp | 330bp | negative | T2/T4    | T | No  | No  | $\leq 0.25$ (S) | 2 (S)   | This study            |
| MabLR C115 | Respiratory | MAS | MAS (650bp/30bp) | 420bp | 290bp | 540bp | negative | T5       | T | Yes | Yes | $\leq 0.25$ (S) | 2 (S)   | This study            |
| MabLR C116 | Respiratory | ABS | ABS (150bp/90bp) | 500bp | 650bp | 330bp | negative | T2/T4    | T | No  | No  | 1 (S)           | >32 (R) | This study            |
| MabLR      | Respiratory | ABS | ABS              | 500bp | 650bp | 330bp | negative | T2/T4    | T | No  | No  | 0.5             | >32     | This study            |

|            |             |     |                   |       |       |       |          |          |   |     |     |                 |         |                       |
|------------|-------------|-----|-------------------|-------|-------|-------|----------|----------|---|-----|-----|-----------------|---------|-----------------------|
| C117       | atory       |     | (150bp/900bp)     |       |       |       |          |          |   |     |     | (S)             | (R)     |                       |
| MabLR C118 | Respiratory | ABS | ABS (150bp/900bp) | 500bp | 650bp | 330bp | negative | T2/T4    | T | No  | No  | 0.5 (S)         | >32 (R) | This study            |
| MabLR C119 | Respiratory | ABS | ABS (150bp/900bp) | 500bp | 650bp | 330bp | negative | T2/T4    | T | No  | No  | 0.5 (S)         | >32 (R) | This study            |
| MabLR C12  | Respiratory | ABS | ABS (150bp/900bp) | 500bp | 650bp | 330bp | negative | T2/T4    | T | No  | No  | 0.5 (S)         | >32 (R) | Nakanaga et al., 2014 |
| MabLR C120 | Respiratory | ABS | ABS (150bp/900bp) | 500bp | 650bp | 330bp | negative | T2/T4    | T | No  | No  | $\leq 0.25$ (S) | >32 (R) | This study            |
| MabLR C121 | Respiratory | ABS | ABS (150bp/900bp) | 500bp | 650bp | 330bp | negative | T2/T4    | T | No  | No  | 0.5 (S)         | >32 (R) | This study            |
| MabLR C122 | Respiratory | MAS | MAS (650bo/300bp) | 420bp | 290bp | 540bp | negative | T5       | T | Yes | Yes | $\leq 0.25$ (S) | 0.5 (S) | This study            |
| MabLR C123 | Respiratory | ABS | ABS (150bp/900bp) | 500bp | 650bp | 330bp | negative | T2/T4    | T | No  | No  | 1 (S)           | >32 (R) | This study            |
| MabLR C124 | Respiratory | ABS | ABS (150bp/900bp) | 500bp | 650bp | 330bp | negative | T2/T4    | T | No  | No  | $\leq 0.25$ (S) | >32 (R) | This study            |
| MabLR C125 | Respiratory | ABS | ABS (150bp/900bp) | 500bp | 650bp | 330bp | negative | T2/T4    | T | No  | No  | 0.5 (S)         | >32 (R) | This study            |
| MabLR C126 | Respiratory | ABS | ABS (150bp/900bp) | 500bp | 650bp | 330bp | positive | T1/T2/T4 | C | No  | No  | $\leq 0.25$ (S) | 0.5 (S) | This study            |
| MabLR C127 | Respiratory | MAS | MAS (650bo/300bp) | 420bp | 290bp | 540bp | negative | T5       | T | Yes | Yes | $\leq 0.25$ (S) | 0.5 (S) | This study            |

|            |             |     |                                  |       |       |       |          |       |   |     |     |                         |                     |                       |
|------------|-------------|-----|----------------------------------|-------|-------|-------|----------|-------|---|-----|-----|-------------------------|---------------------|-----------------------|
| MabLR C128 | Respiratory | ABS | 0bp)<br>ABS<br>(150bp/90<br>0bp) | 500bp | 650bp | 330bp | negative | T2/T4 | T | No  | No  | 0.5<br>(S)              | >32<br>(R)          | This study            |
| MabLR C13  | Respiratory | ABS | ABS<br>(150bp/90<br>0bp)         | 500bp | 650bp | 330bp | negative | T2/T4 | T | No  | No  | $\leq 0.2$<br>5 (S)     | 16<br>(R)           | Nakanaga et al., 2014 |
| MabLR C130 | Respiratory | MAS | MAS<br>(650bo/30<br>0bp)         | 420bp | 290bp | 540bp | negative | T5    | T | Yes | Yes | $\leq 0.2$<br>5 (S)     | 0.5<br>(S)          | This study            |
| MabLR C131 | Respiratory | MAS | MAS<br>(650bo/30<br>0bp)         | 420bp | 290bp | 540bp | negative | T5    | T | Yes | Yes | $\leq 0.2$<br>5 (S)     | 1 (S)               | This study            |
| MabLR C132 | Respiratory | MAS | MAS<br>(650bo/30<br>0bp)         | 420bp | 290bp | 540bp | negative | T5    | T | Yes | Yes | $\leq 0.2$<br>5 (S)     | 2 (S)               | This study            |
| MabLR C133 | Respiratory | MAS | MAS<br>(650bo/30<br>0bp)         | 420bp | 290bp | 540bp | negative | T5    | T | Yes | Yes | $\leq 0.2$<br>5 (S)     | $\leq 0.2$<br>5 (S) | This study            |
| MabLR C134 | Respiratory | ABS | ABS<br>(150bp/90<br>0bp)         | 500bp | 650bp | 330bp | negative | T2/T4 | T | No  | No  | $\leq 0.2$<br>5 (S)     | >32<br>(R)          | This study            |
| MabLR C135 | Respiratory | ABS | ABS<br>(150bp/90<br>0bp)         | 500bp | 650bp | 330bp | negative | T2/T4 | T | No  | No  | >32 <sup>f</sup><br>(R) | >32<br>(R)          | This study            |
| MabLR C136 | Respiratory | ABS | ABS<br>(150bp/90<br>0bp)         | 500bp | 650bp | 330bp | negative | T2/T4 | T | No  | No  | $\leq 0.2$<br>5 (S)     | >32<br>(R)          | This study            |
| MabLR C137 | Respiratory | MAS | MAS<br>(650bo/30<br>0bp)         | 420bp | 290bp | 540bp | negative | T5    | T | Yes | Yes | $\leq 0.2$<br>5 (S)     | 2 (S)               | This study            |
| MabLR C138 | Respiratory | MAS | MAS<br>(650bo/30<br>0bp)         | 420bp | 290bp | 540bp | negative | T5    | T | Yes | Yes | $\leq 0.2$<br>5 (S)     | 2 (S)               | This study            |

|            |             |     |                   |       |       |       |          |          |   |     |     |                  |         |                       |
|------------|-------------|-----|-------------------|-------|-------|-------|----------|----------|---|-----|-----|------------------|---------|-----------------------|
| MabLR C139 | Respiratory | ABS | ABS (150bp/900bp) | 500bp | 650bp | 330bp | negative | T2/T4    | T | No  | No  | 32 (R)           | >32 (R) | This study            |
| MabLR C14  | Respiratory | ABS | ABS (150bp/900bp) | 500bp | 650bp | 330bp | negative | T2/T4    | T | No  | No  | 4 (I)            | >32 (R) | Nakanaga et al., 2014 |
| MabLR C140 | Respiratory | ABS | ABS (150bp/900bp) | 500bp | 650bp | 330bp | negative | T2/T4    | T | No  | No  | 2 (S)            | >32 (R) | This study            |
| MabLR C142 | Respiratory | ABS | ABS (150bp/900bp) | 500bp | 650bp | 330bp | negative | T2/T4    | T | No  | No  | 0.5 (S)          | >32 (R) | This study            |
| MabLR C143 | Respiratory | MAS | ND (650bp/900bp)  | 420bp | 290bp | 540bp | negative | T5       | T | Yes | Yes | $\leq 0.2$ 5 (S) | 0.5 (S) | This study            |
| MabLR C144 | Respiratory | MAS | ND (650bp/900bp)  | 420bp | 290bp | 540bp | negative | T5       | T | Yes | Yes | $\leq 0.2$ 5 (S) | 0.5 (S) | This study            |
| MabLR C145 | Respiratory | ABS | ND (150bp/300bp)  | 500bp | 650bp | 330bp | negative | T2/T4    | T | No  | No  | 1 (S)            | >32 (R) | This study            |
| MabLR C146 | Respiratory | ABS | ABS (150bp/900bp) | 500bp | 650bp | 330bp | positive | T1/T2/T4 | C | No  | No  | $\leq 0.2$ 5 (S) | 0.5 (S) | This study            |
| MabLR C148 | Respiratory | ABS | ABS (150bp/900bp) | 500bp | 650bp | 330bp | negative | T2/T4    | T | No  | No  | 2 (S)            | >32 (R) | This study            |
| MabLR C149 | Respiratory | ABS | ABS (150bp/900bp) | 500bp | 650bp | 330bp | negative | T2/T4    | T | No  | No  | $\leq 0.2$ 5 (S) | >32 (R) | This study            |
| MabLR C152 | Respiratory | ABS | ABS (150bp/900bp) | 500bp | 650bp | 330bp | negative | T2/T4    | T | No  | No  | 16 (R)           | >32 (R) | This study            |
| MabLR      | Respiratory | ABS | ABS               | 500bp | 650bp | 330bp | negative | T2/T4    | T | No  | No  | 4 (I)            | >32     | This study            |

|           |             |     |                   |        |       |       |          |       |   |     |     |                 |                 |                       |  |
|-----------|-------------|-----|-------------------|--------|-------|-------|----------|-------|---|-----|-----|-----------------|-----------------|-----------------------|--|
| C153      | atory       |     | (150bp/900bp)     |        |       |       |          |       |   |     |     |                 | (R)             |                       |  |
| MabLR C2  | Respiratory | MAS | MAS (650bp/300bp) | 420bp  | 290bp | 540bp | negative | T5    | T | Yes | Yes | $\leq 0.25$ (S) | 1 (S)           | Nakanaga et al., 2014 |  |
| MabLR C26 | Respiratory | ABS | ND (150bp/300bp)  | 500bp  | 650bp | 330bp | negative | T2/T4 | T | No  | No  | $\leq 0.25$ (S) | 32 (R)          | Nakanaga et al., 2014 |  |
| MabLR C27 | Respiratory | BOL | ABS (150bp/900bp) | 1200bp | 450bp | 670bp | negative | T2/T3 | T | No  | No  | >32 (R)         | >32 (R)         | Nakanaga et al., 2014 |  |
| MabLR C28 | Respiratory | MAS | MAS (650bp/300bp) | 420bp  | 290bp | 540bp | negative | T5    | T | Yes | Yes | $\leq 0.25$ (S) | 1 (S)           | Nakanaga et al., 2014 |  |
| MabLR C3  | Respiratory | ABS | ABS (150bp/900bp) | 500bp  | 650bp | 330bp | negative | T2/T4 | T | No  | No  | 0.5 (S)         | >32 (R)         | Nakanaga et al., 2014 |  |
| MabLR C30 | Respiratory | MAS | MAS (650bp/300bp) | 420bp  | 290bp | 540bp | negative | T5    | T | Yes | Yes | $\leq 0.25$ (S) | >32 (R)         | Nakanaga et al., 2014 |  |
| MabLR C31 | Respiratory | MAS | MAS (650bp/300bp) | 420bp  | 290bp | 540bp | negative | T5    | T | Yes | Yes | $\leq 0.25$ (S) | $\leq 0.25$ (S) | Nakanaga et al., 2014 |  |
| MabLR C32 | Respiratory | BOL | ABS (150bp/900bp) | 1200bp | 450bp | 670bp | negative | T2/T3 | T | No  | No  | $\leq 0.25$ (S) | >32 (R)         | Nakanaga et al., 2014 |  |
| MabLR C33 | Respiratory | MAS | MAS (650bp/300bp) | 420bp  | 290bp | 540bp | negative | T5    | T | Yes | Yes | $\leq 0.25$ (S) | 0.5 (S)         | Nakanaga et al., 2014 |  |
| MabLR C34 | Respiratory | MAS | MAS (650bp/300bp) | 420bp  | 290bp | 540bp | negative | T5    | T | Yes | Yes | $\leq 0.25$ (S) | 0.5 (S)         | Nakanaga et al., 2014 |  |
| MabLR C35 | Respiratory | ABS | ABS (150bp/900bp) | 500bp  | 650bp | 330bp | negative | T2/T4 | T | No  | No  | $\leq 0.25$ (S) | >32 (R)         | Nakanaga et al., 2014 |  |

|           |             |     |                                  |       |       |       |          |       |   |    |    |                     |            |                       |
|-----------|-------------|-----|----------------------------------|-------|-------|-------|----------|-------|---|----|----|---------------------|------------|-----------------------|
| MabLR C36 | Respiratory | ABS | 0bp)<br>ABS<br>(150bp/90<br>0bp) | 500bp | 650bp | 330bp | negative | T2/T4 | T | No | No | $\leq 0.2$<br>5 (S) | >32<br>(R) | Nakanaga et al., 2014 |
| MabLR C37 | Respiratory | ABS | ABS<br>(150bp/90<br>0bp)         | 500bp | 650bp | 330bp | negative | T2/T4 | T | No | No | $\leq 0.2$<br>5 (S) | 32<br>(R)  | Nakanaga et al., 2014 |
| MabLR C38 | Respiratory | ABS | ABS<br>(150bp/90<br>0bp)         | 500bp | 650bp | 330bp | negative | T2/T4 | T | No | No | $\leq 0.2$<br>5 (S) | >32<br>(R) | Nakanaga et al., 2014 |
| MabLR C39 | Respiratory | ABS | ABS<br>(150bp/90<br>0bp)         | 500bp | 650bp | 330bp | negative | T2/T4 | T | No | No | $\leq 0.2$<br>5 (S) | >32<br>(R) | Nakanaga et al., 2014 |
| MabLR C40 | Respiratory | ABS | ABS<br>(150bp/90<br>0bp)         | 500bp | 650bp | 330bp | negative | T2/T4 | T | No | No | $\leq 0.2$<br>5 (S) | >32<br>(R) | Nakanaga et al., 2014 |
| MabLR C41 | Respiratory | ABS | ABS<br>(150bp/90<br>0bp)         | 500bp | 650bp | 330bp | negative | T2/T4 | T | No | No | $\leq 0.2$<br>5 (S) | >32<br>(R) | Nakanaga et al., 2014 |
| MabLR C42 | Respiratory | ABS | ABS<br>(150bp/90<br>0bp)         | 500bp | 650bp | 330bp | negative | T2/T4 | T | No | No | >32<br>(R)          | >32<br>(R) | Nakanaga et al., 2014 |
| MabLR C43 | Respiratory | ABS | ABS<br>(150bp/90<br>0bp)         | 500bp | 650bp | 330bp | negative | T2/T4 | T | No | No | $\leq 0.2$<br>5 (S) | >32<br>(R) | Nakanaga et al., 2014 |
| MabLR C44 | Respiratory | ABS | ABS<br>(150bp/90<br>0bp)         | 500bp | 650bp | 330bp | negative | T2/T4 | T | No | No | $\leq 0.2$<br>5 (S) | >32<br>(R) | Nakanaga et al., 2014 |
| MabLR C46 | Respiratory | ABS | ABS<br>(150bp/90<br>0bp)         | 500bp | 650bp | 330bp | negative | T2/T4 | T | No | No | $\leq 0.2$<br>5 (S) | >32<br>(R) | Nakanaga et al., 2014 |
| MabLR C47 | Respiratory | ABS | ABS<br>(150bp/90<br>0bp)         | 500bp | 650bp | 330bp | negative | T2/T4 | T | No | No | 1 (S)               | >32<br>(R) | Nakanaga et al., 2014 |



|           |             |     |                   |       |       |       |          |          |   |     |     |                   |                 |                       |
|-----------|-------------|-----|-------------------|-------|-------|-------|----------|----------|---|-----|-----|-------------------|-----------------|-----------------------|
| MabLR C48 | Respiratory | ABS | ABS (150bp/900bp) | 500bp | 650bp | 330bp | negative | T2/T4    | T | No  | No  | $\leq 0.25$ (S)   | >32 (R)         | Nakanaga et al., 2014 |
| MabLR C5  | Respiratory | MAS | MAS (650bp/300bp) | 420bp | 290bp | 540bp | negative | T5       | T | Yes | Yes | $\leq 0.25$ (S)   | 0.5 (S)         | Nakanaga et al., 2014 |
| MabLR C50 | Respiratory | MAS | MAS (650bp/300bp) | 420bp | 290bp | 540bp | negative | T5       | T | Yes | Yes | $\leq 0.25^f$ (S) | $\leq 0.25$ (S) | Nakanaga et al., 2014 |
| MabLR C51 | Respiratory | ABS | ABS (150bp/900bp) | 500bp | 650bp | 330bp | positive | T1/T2/T4 | C | No  | No  | $\leq 0.25$ (S)   | 2 (S)           | Nakanaga et al., 2014 |
| MabLR C52 | Respiratory | ABS | ABS (150bp/900bp) | 500bp | 650bp | 330bp | negative | T2/T4    | T | No  | No  | 0.5 (S)           | >32 (R)         | Nakanaga et al., 2014 |
| MabLR C53 | Respiratory | ABS | ABS (150bp/900bp) | 500bp | 650bp | 330bp | negative | T2/T4    | T | No  | No  | $\leq 0.25$ (S)   | >32 (R)         | Nakanaga et al., 2014 |
| MabLR C54 | Respiratory | MAS | MAS (650bp/300bp) | 420bp | 290bp | 540bp | negative | T5       | T | Yes | Yes | $\leq 0.25$ (S)   | 0.5 (S)         | Nakanaga et al., 2014 |
| MabLR C55 | Respiratory | MAS | MAS (650bp/300bp) | 420bp | 290bp | 540bp | negative | T5       | T | Yes | Yes | $\leq 0.25^f$ (S) | $\leq 0.25$ (S) | Nakanaga et al., 2014 |
| MabLR C56 | Respiratory | ABS | ABS (150bp/900bp) | 500bp | 650bp | 330bp | negative | T2/T4    | T | No  | No  | $\leq 0.25^f$ (S) | 4 (I)           | Nakanaga et al., 2014 |
| MabLR C57 | Respiratory | MAS | MAS (650bp/300bp) | 420bp | 290bp | 540bp | negative | T5       | T | Yes | Yes | $\leq 0.25$ (S)   | $\leq 0.25$ (S) | Nakanaga et al., 2014 |
| MabLR C58 | Respiratory | ABS | ABS (150bp/900bp) | 500bp | 650bp | 330bp | negative | T2/T4    | T | No  | No  | $\leq 0.25$ (S)   | >32 (R)         | Nakanaga et al., 2014 |
| MabLR     | Respiratory | MAS | MAS               | 420bp | 290bp | 540bp | negative | T5       | T | Yes | Yes | $\leq 0.25$       | 0.5             | Nakanaga et           |

|           |             |     |                   |       |       |       |          |          |   |     |     |                   |                 |                       |           |
|-----------|-------------|-----|-------------------|-------|-------|-------|----------|----------|---|-----|-----|-------------------|-----------------|-----------------------|-----------|
| C6        | atory       |     | (650bo/300bp)     |       |       |       |          |          |   |     |     |                   | 5 (S)           | (S)                   | al., 2014 |
| MabLR C60 | Respiratory | ABS | ABS (150bp/900bp) | 500bp | 650bp | 330bp | negative | T2/T4    | T | No  | No  | $\leq 0.25$ (S)   | >32 (R)         | Nakanaga et al., 2014 |           |
| MabLR C62 | Respiratory | ABS | ABS (150bp/900bp) | 500bp | 650bp | 330bp | negative | T2/T4    | T | No  | No  | $\leq 0.25$ (S)   | >32 (R)         | Nakanaga et al., 2014 |           |
| MabLR C63 | Respiratory | MAS | MAS (650bo/300bp) | 420bp | 290bp | 540bp | negative | T5       | T | Yes | Yes | $\leq 0.25$ (S)   | $\leq 0.25$ (S) | Nakanaga et al., 2014 |           |
| MabLR C64 | Respiratory | ABS | ABS (150bp/900bp) | 500bp | 650bp | 330bp | positive | T1/T2/T4 | C | No  | No  | $\leq 0.25^f$ (S) | $\leq 0.25$ (S) | Nakanaga et al., 2014 |           |
| MabLR C65 | Respiratory | MAS | MAS (650bo/300bp) | 420bp | 290bp | 540bp | negative | T5       | T | Yes | Yes | $\leq 0.25$ (S)   | 4 (I)           | Nakanaga et al., 2014 |           |
| MabLR C66 | Respiratory | ABS | ABS (150bp/900bp) | 500bp | 650bp | 330bp | negative | T2/T4    | T | No  | No  | $\leq 0.25$ (S)   | >32 (R)         | Nakanaga et al., 2014 |           |
| MabLR C67 | Respiratory | MAS | MAS (650bo/300bp) | 420bp | 290bp | 540bp | negative | T5       | T | Yes | Yes | $\leq 0.25$ (S)   | 0.5 (S)         | Nakanaga et al., 2014 |           |
| MabLR C68 | Respiratory | MAS | MAS (650bo/300bp) | 420bp | 290bp | 540bp | negative | T5       | T | Yes | Yes | $\leq 0.25$ (S)   | 0.5 (S)         | Nakanaga et al., 2014 |           |
| MabLR C69 | Respiratory | ABS | ABS (150bp/900bp) | 500bp | 650bp | 330bp | negative | T2/T4    | T | No  | No  | $\leq 0.25$ (S)   | >32 (R)         | Nakanaga et al., 2014 |           |
| MabLR C7  | Respiratory | ABS | ABS (150bp/900bp) | 500bp | 650bp | 330bp | negative | T2/T4    | T | No  | No  | $\leq 0.25$ (S)   | >32 (R)         | Nakanaga et al., 2014 |           |
| MabLR C70 | Respiratory | ABS | ABS (150bp/900bp) | 500bp | 650bp | 330bp | positive | T1/T2/T4 | C | No  | No  | $\leq 0.25$ (S)   | >32 (R)         | Nakanaga et al., 2014 |           |

|           |             |     |                                  |        |       |       |          |              |   |     |     |                                  |                     |                       |
|-----------|-------------|-----|----------------------------------|--------|-------|-------|----------|--------------|---|-----|-----|----------------------------------|---------------------|-----------------------|
| MabLR C71 | Respiratory | ABS | 0bp)<br>ABS<br>(150bp/90<br>0bp) | 500bp  | 650bp | 330bp | negative | T2/T4        | T | No  | No  | $\leq 0.2$<br>5 (S)              | >32<br>(R)          | Nakanaga et al., 2014 |
| MabLR C72 | Respiratory | ABS | ABS<br>(150bp/90<br>0bp)         | 500bp  | 650bp | 330bp | negative | T2/T4        | T | No  | No  | $\leq 0.2$<br>5 (S)              | >32<br>(R)          | Nakanaga et al., 2014 |
| MabLR C73 | Respiratory | MAS | MAS<br>(650bo/30<br>0bp)         | 420bp  | 290bp | 540bp | negative | T5           | T | Yes | Yes | $\leq 0.2$<br>5 (S)              | 2 (S)               | Nakanaga et al., 2014 |
| MabLR C74 | Respiratory | MAS | MAS<br>(650bo/30<br>0bp)         | 420bp  | 290bp | 540bp | negative | T5           | T | Yes | Yes | $\leq 0.2$<br>5 <sup>f</sup> (S) | $\leq 0.2$<br>5 (S) | Nakanaga et al., 2014 |
| MabLR C75 | Respiratory | ABS | ABS<br>(150bp/90<br>0bp)         | 500bp  | 650bp | 330bp | positive | T1/T2/T<br>4 | C | No  | No  | $\leq 0.2$<br>5 <sup>f</sup> (S) | $\leq 0.2$<br>5 (S) | Nakanaga et al., 2014 |
| MabLR C76 | Respiratory | ABS | ABS<br>(150bp/90<br>0bp)         | 500bp  | 650bp | 330bp | negative | T2/T4        | T | No  | No  | $\leq 0.2$<br>5 (S)              | >32<br>(R)          | Nakanaga et al., 2014 |
| MabLR C77 | Respiratory | MAS | MAS<br>(650bo/30<br>0bp)         | 420bp  | 290bp | 540bp | positive | T1/T5        | T | Yes | Yes | >32 <sup>f</sup><br>(R)          | >32<br>(R)          | Nakanaga et al., 2014 |
| MabLR C78 | Respiratory | BOL | ND<br>(150bp/30<br>0bp)          | 1200bp | 450bp | 670bp | negative | T2/T3        | T | No  | No  | $\leq 0.2$<br>5 (S)              | >32<br>(R)          | Nakanaga et al., 2014 |
| MabLR C79 | Respiratory | ABS | ABS<br>(150bp/90<br>0bp)         | 500bp  | 650bp | 330bp | negative | T2/T4        | T | No  | No  | $\leq 0.2$<br>5 (S)              | >32<br>(R)          | Nakanaga et al., 2014 |
| MabLR C8  | Respiratory | MAS | MAS<br>(650bo/30<br>0bp)         | 420bp  | 290bp | 540bp | negative | T5           | T | Yes | Yes | $\leq 0.2$<br>5 (S)              | $\leq 0.2$<br>5 (S) | Nakanaga et al., 2014 |
| MabLR C80 | Respiratory | ABS | ABS<br>(150bp/90<br>0bp)         | 500bp  | 650bp | 330bp | negative | T2/T4        | T | No  | No  | $\leq 0.2$<br>5 (S)              | >32<br>(R)          | Nakanaga et al., 2014 |

|           |             |     |                   |       |       |       |          |       |   |     |     |                   |                 |                       |
|-----------|-------------|-----|-------------------|-------|-------|-------|----------|-------|---|-----|-----|-------------------|-----------------|-----------------------|
| MabLR C82 | Skin lesion | MAS | MAS (650bp/300bp) | 420bp | 290bp | 540bp | negative | T5    | T | Yes | Yes | $\leq 0.25$ (S)   | 0.5 (S)         | Nakanaga et al., 2014 |
| MabLR C83 | Respiratory | ABS | ABS (150bp/900bp) | 500bp | 650bp | 330bp | negative | T2/T4 | T | No  | No  | $>32$ (R)         | $>32$ (R)       | Nakanaga et al., 2014 |
| MabLR C86 | Respiratory | ABS | ND (150bp/300bp)  | 500bp | 650bp | 330bp | negative | T2/T4 | T | No  | No  | $\leq 0.25^f$ (S) | $>32$ (R)       | Nakanaga et al., 2014 |
| MabLR C87 | Respiratory | ABS | ABS (150bp/900bp) | 500bp | 650bp | 330bp | negative | T2/T4 | T | No  | No  | $>32$ (R)         | $>32$ (R)       | Nakanaga et al., 2014 |
| MabLR C88 | Respiratory | MAS | MAS (650bp/300bp) | 420bp | 290bp | 540bp | negative | T5    | T | Yes | Yes | $\leq 0.25$ (S)   | 0.5 (S)         | Nakanaga et al., 2014 |
| MabLR C89 | Respiratory | ABS | ABS (150bp/900bp) | 500bp | 650bp | 330bp | negative | T2/T4 | T | No  | No  | $\leq 0.25$ (S)   | 16 (R)          | Nakanaga et al., 2014 |
| MabLR C9  | Respiratory | ABS | ABS (150bp/900bp) | 500bp | 650bp | 330bp | negative | T2/T4 | T | No  | No  | 0.5 (S)           | $>32$ (R)       | Nakanaga et al., 2014 |
| MabLR C90 | Respiratory | ABS | ABS (150bp/900bp) | 500bp | 650bp | 330bp | negative | T2/T4 | T | No  | No  | $\leq 0.25$ (S)   | 16 (R)          | Nakanaga et al., 2014 |
| MabLR C91 | Respiratory | MAS | MAS (650bp/300bp) | 420bp | 290bp | 540bp | negative | T5    | T | Yes | Yes | $\leq 0.25$ (S)   | $\leq 0.25$ (S) | Nakanaga et al., 2014 |
| MabLR C92 | Respiratory | ABS | ABS (150bp/900bp) | 500bp | 650bp | 330bp | negative | T2/T4 | T | No  | No  | $8^f$ (R)         | $>32$ (R)       | Nakanaga et al., 2014 |
| MabLR C93 | Respiratory | ABS | ABS (150bp/900bp) | 500bp | 650bp | 330bp | negative | T2/T4 | T | No  | No  | $\leq 0.25$ (S)   | 16 (R)          | Nakanaga et al., 2014 |
| MabLR     | Respir      | MAS | MAS               | 420bp | 290bp | 540bp | negative | T5    | T | Yes | Yes | $\leq 0.25$       | $\leq 0.25$     | Nakanaga et           |

|            |             |     |                   |       |       |       |          |       |   |     |     |                     |                     |                       |           |
|------------|-------------|-----|-------------------|-------|-------|-------|----------|-------|---|-----|-----|---------------------|---------------------|-----------------------|-----------|
| C94        | atory       |     | (650bo/300bp)     |       |       |       |          |       |   |     |     |                     | 5 (S)               | 5 (S)                 | al., 2014 |
| MabLR C95  | Respiratory | ABS | ABS (150bp/900bp) | 500bp | 650bp | 330bp | negative | T2/T4 | T | No  | No  | $\leq 0.2$<br>5 (S) | >32<br>(R)          | Nakanaga et al., 2014 |           |
| MabLR C96  | Respiratory | ABS | ABS (150bp/900bp) | 500bp | 650bp | 330bp | negative | T2/T4 | T | No  | No  | $\leq 0.2$<br>5 (S) | >32<br>(R)          | Nakanaga et al., 2014 |           |
| MabLR C98  | Respiratory | MAS | MAS (650bo/300bp) | 420bp | 290bp | 540bp | negative | T5    | T | Yes | Yes | $\leq 0.2$<br>5 (S) | $\leq 0.2$<br>5 (S) | Nakanaga et al., 2014 |           |
| MabLR C99  | Respiratory | ABS | ABS (150bp/900bp) | 500bp | 650bp | 330bp | negative | T2/T4 | T | No  | No  | $\leq 0.2$<br>5 (S) | >32<br>(R)          | Nakanaga et al., 2014 |           |
| MabLR CA1  | Skin lesion | MAS | MAS (650bo/300bp) | 420bp | 290bp | 540bp | negative | T5    | T | Yes | Yes | $\leq 0.2$<br>5 (S) | 1 (S)               | Nakanaga et al., 2014 |           |
| MabLR CA10 | Skin lesion | MAS | MAS (650bo/300bp) | 420bp | 290bp | 540bp | negative | T5    | T | Yes | Yes | $\leq 0.2$<br>5 (S) | 2 (S)               | Nakanaga et al., 2014 |           |
| MabLR CA11 | Skin lesion | MAS | MAS (650bo/300bp) | 420bp | 290bp | 540bp | negative | T5    | T | Yes | Yes | $\leq 0.2$<br>5 (S) | $\leq 0.2$<br>5 (S) | Nakanaga et al., 2014 |           |
| MabLR CA12 | Skin lesion | ABS | ABS (150bp/900bp) | 500bp | 650bp | 330bp | negative | T2/T4 | T | No  | No  | 0.5<br>(S)          | >32<br>(R)          | Nakanaga et al., 2014 |           |
| MabLR CA13 | Skin lesion | MAS | MAS (650bo/300bp) | 420bp | 290bp | 540bp | negative | T5    | T | Yes | Yes | $\leq 0.2$<br>5 (S) | 0.5<br>(S)          | Nakanaga et al., 2014 |           |
| MabLR CA14 | Skin lesion | MAS | MAS (650bo/300bp) | 420bp | 290bp | 540bp | negative | T5    | T | Yes | Yes | $\leq 0.2$<br>5 (S) | 2 (S)               | Nakanaga et al., 2014 |           |
| MabLR CA2  | Skin lesion | MAS | MAS (650bo/300bp) | 420bp | 290bp | 540bp | negative | T5    | T | Yes | Yes | $\leq 0.2$<br>5 (S) | 0.5<br>(S)          | Nakanaga et al., 2014 |           |

|              |             |     |                          |        |       |       |          |              |   |     |     |                     |                     |                          |
|--------------|-------------|-----|--------------------------|--------|-------|-------|----------|--------------|---|-----|-----|---------------------|---------------------|--------------------------|
| MabLR<br>CB1 | Environment | MAS | MAS<br>(650bp/30<br>0bp) | 420bp  | 290bp | 540bp | negative | T5           | T | Yes | Yes | $\leq 0.2$<br>5 (S) | $\leq 0.2$<br>5 (S) | Nakanaga et<br>al., 2014 |
| MabMT<br>10  | Respiratory | ABS | ABS<br>(150bp/90<br>0bp) | 500bp  | 650bp | 330bp | positive | T1/T2/T<br>4 | C | No  | No  | $\leq 0.2$<br>5 (S) | 2 (S)               | This study               |
| MabMT<br>11  | Respiratory | ABS | ABS<br>(150bp/90<br>0bp) | 500bp  | 650bp | 330bp | positive | T1/T2/T<br>4 | C | No  | No  | $\leq 0.2$<br>5 (S) | 2 (S)               | This study               |
| MabMT<br>19  | Respiratory | ABS | ABS<br>(150bp/90<br>0bp) | 500bp  | 650bp | 330bp | positive | T1/T2/T<br>4 | T | No  | No  | $\leq 0.2$<br>5 (S) | >32<br>(R)          | This study               |
| MabMT<br>37  | Respiratory | ABS | ABS<br>(150bp/90<br>0bp) | 1200bp | 450bp | 330bp | positive | T1/T2/T<br>4 | C | No  | No  | $\leq 0.2$<br>5 (S) | 2 (S)               | This study               |
| MabNG        | Respiratory | ABS | ABS<br>(150bp/90<br>0bp) | 500bp  | 650bp | 330bp | positive | T1/T2/T<br>4 | C | No  | No  | $\leq 0.2$<br>5 (S) | 1 (S)               | This study               |
| MabYN<br>KW  | Respiratory | ABS | ABS<br>(150bp/90<br>0bp) | 500bp  | 650bp | 330bp | positive | T1/T2/T<br>4 | C | No  | No  | $\leq 0.2$<br>5 (S) | 2 (S)               | This study               |

<sup>a</sup>Not Applicable, <sup>b</sup>*M. abscessus*, <sup>c</sup>*M. massiliense*, <sup>d</sup>*M. bolletii*, <sup>e</sup>Not determined, <sup>f</sup>measured at day 7 because of very slow growth. R, resistant; I, intermediate; S, susceptible

**Table S2 Subspecies and macrolide susceptibility identification of 103 clinical isolates from Taiwan using the DNA chromatography.**

| Strain   | DNA chromatography | Expected subspecies | Expected <i>erm</i> (41) pos 28 genotype | Expected <i>erm</i> (41) truncation |
|----------|--------------------|---------------------|------------------------------------------|-------------------------------------|
| TJMA_001 | T1/T2/T4           | ABS <sup>a</sup>    | C                                        | No                                  |
| TJMA_002 | T2/T4/T5           | ND <sup>d</sup>     | T                                        | No                                  |
| TJMA_004 | T2/T4              | ABS                 | T                                        | No                                  |
| TJMA_005 | T1/T2/T4           | ABS                 | C                                        | No                                  |
| TJMA_008 | T5                 | MAS                 | T                                        | Yes                                 |
| TJMA_009 | T2/T4              | ABS                 | T                                        | No                                  |
| TJMA_010 | T1/T2/T4           | ABS                 | C                                        | No                                  |
| TJMA_011 | T2/T4              | ABS                 | T                                        | No                                  |
| TJMA_015 | T2/T4              | ABS                 | T                                        | No                                  |
| TJMA_016 | T5                 | MAS                 | T                                        | Yes                                 |
| TJMA_017 | T5                 | MAS                 | T                                        | Yes                                 |
| TJMA_018 | T5                 | MAS                 | T                                        | Yes                                 |
| TJMA_019 | T1/T2/T4           | ABS                 | C                                        | No                                  |
| TJMA_020 | T1/T2/T4           | ABS                 | C                                        | No                                  |
| TJMA_021 | T2/T4              | ABS                 | T                                        | No                                  |
| TJMA_022 | T2/T4              | ABS                 | T                                        | No                                  |
| TJMA_023 | T5                 | MAS                 | T                                        | Yes                                 |
| TJMA_024 | T2/T5              | MAS                 | T                                        | No                                  |
| TJMA_025 | T2/T4              | ABS                 | T                                        | No                                  |
| TJMA_026 | T5                 | MAS                 | T                                        | Yes                                 |
| TJMA_028 | T5                 | MAS                 | T                                        | Yes                                 |
| TJMA_029 | T2/T4              | ABS                 | T                                        | No                                  |
| TJMA_030 | T5                 | MAS                 | T                                        | Yes                                 |
| TJMA_031 | T5                 | MAS                 | T                                        | Yes                                 |
| TJMA_032 | T5                 | MAS                 | T                                        | Yes                                 |
| TJMA_034 | T5                 | MAS                 | T                                        | Yes                                 |
| TJMA_036 | T2/T4              | ABS                 | T                                        | No                                  |
| TJMA_037 | T5                 | MAS                 | T                                        | Yes                                 |
| TJMA_038 | T2/T4              | ABS                 | T                                        | No                                  |
| TJMA_039 | T5                 | MAS                 | T                                        | Yes                                 |
| TJMA_040 | T2/T4              | ABS                 | T                                        | No                                  |
| TJMA_041 | T2/T5              | MAS                 | T                                        | No                                  |
| TJMA_042 | T2/T4              | ABS                 | C                                        | No                                  |

|          |          |                  |   |     |
|----------|----------|------------------|---|-----|
| TJMA_043 | T2/T4    | ABS              | T | No  |
| TJMA_044 | T5       | MAS              | T | Yes |
| TJMA_045 | T5       | MAS              | T | Yes |
| TJMA_046 | T2/T5    | MAS              | T | No  |
| TJMA_048 | T1/T2/T4 | ABS              | C | No  |
| TJMA_050 | T5       | MAS              | T | Yes |
| TJMA_051 | T5       | MAS              | T | Yes |
| TJMA_052 | T5       | MAS              | T | Yes |
| TJMA_053 | T1/T2/T4 | ABS              | C | No  |
| TJMA_054 | T1/T2/T4 | ABS              | T | No  |
| TJMA_055 | T5       | MAS              | T | Yes |
| TJMA_056 | T2/T4    | ABS              | T | No  |
| TJMA_057 | T2/T4    | ABS              | T | No  |
| TJMA_058 | T5       | MAS              | T | Yes |
| TJMA_059 | T5       | MAS              | T | Yes |
| TJMA_061 | T5       | MAS              | T | Yes |
| TJMA_062 | T5       | MAS              | T | Yes |
| TJMA_065 | T2/T4    | ABS              | T | No  |
| TJMA_066 | T2/T4    | ABS              | T | No  |
| TJMA_067 | T5       | MAS              | T | Yes |
| TJMA_068 | T2/T4    | ABS              | T | No  |
| TJMA_069 | T2/T4    | ABS              | T | No  |
| TJMA_071 | T5       | MAS              | T | Yes |
| TJMA_074 | T2/T4    | ABS              | T | No  |
| TJMA_075 | T5       | MAS              | T | Yes |
| TJMA_077 | T2/T4    | ABS              | T | No  |
| TJMA_078 | T5       | MAS              | T | Yes |
| TJMA_079 | T2/T4    | ABS              | T | No  |
| TJMA_080 | T1/T2/T4 | ABS              | T | No  |
| TJMA_081 | T2/T4    | ABS              | T | No  |
| TJMA_083 | T2/T4    | ABS              | T | No  |
| TJMA_085 | T5       | MAS              | T | Yes |
| TJMA_086 | T2/T3    | BOL <sup>c</sup> | T | No  |
| TJMA_087 | T5       | MAS              | T | Yes |
| TJMA_089 | T2/T3    | BOL              | T | No  |
| TJMA_090 | T1/T2/T4 | ABS              | C | No  |
| TJMA_091 | T2/T4    | ABS              | T | No  |
| TJMA_092 | T1/T2/T4 | ABS              | C | No  |



|          |          |     |   |     |
|----------|----------|-----|---|-----|
| TJMA_095 | T5       | MAS | T | Yes |
| TJMA_096 | T1/T2/T4 | ABS | C | No  |
| TJMA_097 | T5       | MAS | T | Yes |
| TJMA_098 | T2/T4    | ABS | T | No  |
| TJMA_099 | T5       | MAS | T | Yes |
| TJMA_100 | T5       | MAS | T | Yes |
| TJMA_101 | T5       | MAS | T | Yes |
| TJMA_102 | T5       | MAS | T | Yes |
| TJMA_103 | T2/T4    | ABS | T | No  |
| TJMA_104 | T4/T5    | ND  | T | Yes |
| TJMA_105 | T2/T4    | ABS | T | No  |
| TJMA_106 | T5       | MAS | T | Yes |
| TJMA_107 | T5       | MAS | T | Yes |
| TJMA_108 | T2/T4    | ABS | T | No  |
| TJMA_109 | T5       | MAS | T | Yes |
| TJMA_110 | T2/T4    | ABS | T | No  |
| TJMA_111 | T5       | MAS | T | Yes |
| TJMA_112 | T2/T4    | ABS | T | No  |
| TJMA_113 | T5       | MAS | T | Yes |
| TJMA_114 | T5       | MAS | T | Yes |
| TJMA_115 | T5       | MAS | T | Yes |
| TJMA_116 | T5       | MAS | T | Yes |
| TJMA_117 | T2/T4    | ABS | T | No  |
| TJMA_118 | T2/T4    | ABS | T | No  |
| TJMA_119 | T2/T4    | ABS | T | No  |
| TJMA_120 | T2/T4    | ABS | C | No  |
| TJMA_121 | T5       | MAS | T | Yes |
| TJMA_122 | T5       | MAS | T | Yes |
| TJMA_123 | T2/T4    | ABS | C | No  |
| TJMA_124 | T5       | MAS | T | Yes |
| TJMA_125 | T2/T4    | ABS | T | No  |
| TJMA_126 | T5       | MAS | T | Yes |

<sup>a</sup>*M. abscessus*, <sup>b</sup>*M. massiliense*, <sup>c</sup>*M. bolletii*, <sup>d</sup>Not Determined

852

**Table S3 Basic statistics of WGS data of 148 environmental or clinical isolates from Japan.**

| Strain | Total length | N50 | Contigs | Coverage | GC (%) |
|--------|--------------|-----|---------|----------|--------|
|--------|--------------|-----|---------|----------|--------|

|            |         |        |     |        |       |
|------------|---------|--------|-----|--------|-------|
| Mab14033-1 | 5316180 | 213605 | 52  | 85.97  | 64.02 |
| Mab18036   | 5096890 | 165746 | 66  | 95.16  | 64.19 |
| MabF6      | 4799461 | 213229 | 38  | 93.79  | 64.28 |
| MabJATA1   | 5057593 | 118021 | 100 | 51.65  | 63.92 |
| MabK14     | 5071761 | 200737 | 90  | 86.33  | 64.08 |
| MabK16     | 5009684 | 118480 | 81  | 37.05  | 64.19 |
| MabK30     | 4704077 | 165959 | 65  | 41.86  | 64.28 |
| MabK34     | 4992243 | 125124 | 89  | 61.64  | 64.19 |
| MabLRC1    | 5056100 | 261212 | 49  | 91.43  | 64.03 |
| MabLRC10   | 5136468 | 119037 | 79  | 88.14  | 64.08 |
| MabLRC100  | 5208261 | 90657  | 117 | 34.86  | 64.22 |
| MabLRC101  | 4940048 | 154666 | 85  | 557.58 | 64.00 |
| MabLRC102  | 4876782 | 133487 | 72  | 48.36  | 64.13 |
| MabLRC103  | 5094430 | 316266 | 42  | 99.24  | 64.18 |
| MabLRC104  | 4814131 | 182880 | 61  | 78.81  | 64.27 |
| MabLRC105  | 4998504 | 118640 | 92  | 85.25  | 64.19 |
| MabLRC106  | 5172540 | 77396  | 112 | 46.42  | 64.03 |
| MabLRC107  | 4868796 | 133548 | 59  | 251.24 | 64.21 |
| MabLRC108  | 5197867 | 77960  | 134 | 31.97  | 64.02 |
| MabLRC109  | 5052053 | 210451 | 59  | 385.87 | 64.12 |
| MabLRC11   | 5088336 | 117715 | 85  | 30.67  | 64.25 |
| MabLRC110  | 5074341 | 175406 | 74  | 511.39 | 63.91 |
| MabLRC112  | 4950965 | 110336 | 83  | 33.97  | 64.19 |
| MabLRC113  | 5069942 | 228504 | 52  | 119.43 | 64.22 |
| MabLRC114  | 5046351 | 171601 | 81  | 46.93  | 63.97 |
| MabLRC115  | 4933766 | 160786 | 54  | 410.02 | 64.23 |
| MabLRC116  | 4862798 | 155632 | 67  | 428.75 | 64.15 |
| MabLRC117  | 5211175 | 171580 | 76  | 52.86  | 64.23 |
| MabLRC118  | 5050669 | 170225 | 59  | 462.33 | 64.17 |
| MabLRC119  | 5225706 | 162382 | 68  | 413.65 | 64.11 |
| MabLRC12   | 5129792 | 224727 | 43  | 118.55 | 64.09 |
| MabLRC120  | 5169047 | 155194 | 69  | 418.65 | 64.10 |
| MabLRC121  | 5214307 | 171554 | 103 | 510.70 | 64.04 |
| MabLRC122  | 5007177 | 81252  | 131 | 62.19  | 64.27 |

|           |         |        |     |        |       |
|-----------|---------|--------|-----|--------|-------|
| MabLRC123 | 4862722 | 136072 | 61  | 262.28 | 64.15 |
| MabLRC124 | 5447796 | 118650 | 94  | 126.34 | 64.05 |
| MabLRC125 | 5222658 | 171501 | 61  | 56.10  | 64.21 |
| MabLRC126 | 5098698 | 137989 | 88  | 305.33 | 64.18 |
| MabLRC127 | 5245766 | 145619 | 71  | 100.32 | 64.13 |
| MabLRC128 | 5156406 | 150654 | 66  | 153.63 | 64.12 |
| MabLRC13  | 5163925 | 245416 | 49  | 61.81  | 64.09 |
| MabLRC130 | 5133271 | 210494 | 60  | 186.76 | 64.20 |
| MabLRC131 | 4802491 | 219424 | 54  | 133.14 | 64.25 |
| MabLRC132 | 4765753 | 299978 | 34  | 421.58 | 64.26 |
| MabLRC133 | 5080591 | 212746 | 53  | 751.19 | 64.17 |
| MabLRC134 | 5416217 | 153472 | 71  | 424.02 | 64.05 |
| MabLRC135 | 4998744 | 203292 | 56  | 559.73 | 64.13 |
| MabLRC136 | 4899407 | 159280 | 63  | 168.71 | 64.14 |
| MabLRC137 | 4994827 | 218647 | 45  | 267.12 | 64.14 |
| MabLRC138 | 4887532 | 152158 | 50  | 88.65  | 64.25 |
| MabLRC139 | 5095699 | 245634 | 60  | 105.80 | 64.12 |
| MabLRC14  | 5061117 | 178838 | 56  | 95.39  | 64.10 |
| MabLRC140 | 4995083 | 225721 | 39  | 115.94 | 64.15 |
| MabLRC142 | 5023755 | 174857 | 65  | 97.49  | 64.14 |
| MabLRC143 | 4917765 | 146819 | 67  | 240.83 | 64.20 |
| MabLRC144 | 5097474 | 230170 | 56  | 401.98 | 64.17 |
| MabLRC145 | 4743087 | 241875 | 43  | 137.04 | 64.27 |
| MabLRC146 | 5088371 | 119729 | 81  | 83.15  | 64.24 |
| MabLRC148 | 4883619 | 165790 | 75  | 32.52  | 64.21 |
| MabLRC149 | 5242717 | 98115  | 107 | 30.35  | 64.16 |
| MabLRC152 | 5921286 | 145522 | 88  | 58.95  | 63.88 |
| MabLRC153 | 5118560 | 183836 | 66  | 56.44  | 64.12 |
| MabLRC2   | 4953806 | 116038 | 89  | 51.98  | 64.04 |
| MabLRC26  | 5042683 | 33929  | 236 | 35.38  | 63.92 |
| MabLRC27  | 4987447 | 146054 | 65  | 50.39  | 64.17 |
| MabLRC28  | 4946695 | 204037 | 59  | 60.71  | 64.06 |
| MabLRC3   | 5131208 | 307864 | 32  | 151.76 | 64.12 |
| MabLRC30  | 5068363 | 96755  | 106 | 119.28 | 64.13 |

|          |         |        |     |        |       |
|----------|---------|--------|-----|--------|-------|
| MabLRC31 | 5155495 | 134195 | 86  | 240.12 | 64.15 |
| MabLRC32 | 4817246 | 157481 | 58  | 48.29  | 64.15 |
| MabLRC33 | 5150972 | 115014 | 97  | 177.72 | 64.10 |
| MabLRC34 | 5248643 | 130199 | 69  | 221.29 | 64.13 |
| MabLRC35 | 5198069 | 124884 | 79  | 91.43  | 64.19 |
| MabLRC36 | 4714847 | 149548 | 66  | 149.30 | 64.29 |
| MabLRC37 | 4861699 | 136740 | 80  | 187.80 | 64.14 |
| MabLRC38 | 4868330 | 190723 | 54  | 236.07 | 64.22 |
| MabLRC39 | 5222551 | 87094  | 120 | 42.81  | 64.20 |
| MabLRC40 | 5116424 | 250925 | 47  | 82.84  | 64.17 |
| MabLRC41 | 4750779 | 164576 | 68  | 85.28  | 64.28 |
| MabLRC42 | 4896417 | 183467 | 48  | 106.34 | 64.14 |
| MabLRC43 | 5224190 | 137429 | 79  | 135.25 | 64.21 |
| MabLRC44 | 5066815 | 100040 | 86  | 232.87 | 64.11 |
| MabLRC46 | 5142041 | 118737 | 85  | 150.13 | 64.12 |
| MabLRC47 | 4795274 | 140613 | 70  | 232.48 | 64.28 |
| MabLRC48 | 4892220 | 109841 | 81  | 64.43  | 64.20 |
| MabLRC5  | 4913445 | 182942 | 55  | 31.98  | 64.17 |
| MabLRC50 | 5027033 | 58544  | 190 | 39.39  | 64.16 |
| MabLRC51 | 4961204 | 171861 | 63  | 200.83 | 64.13 |
| MabLRC52 | 5094238 | 122407 | 84  | 158.59 | 64.10 |
| MabLRC53 | 4960848 | 110308 | 92  | 179.42 | 64.12 |
| MabLRC54 | 5081480 | 128859 | 77  | 430.27 | 64.17 |
| MabLRC55 | 4732816 | 82785  | 115 | 100.96 | 64.34 |
| MabLRC56 | 5242362 | 158217 | 64  | 263.12 | 64.07 |
| MabLRC57 | 5162846 | 143717 | 76  | 242.74 | 64.17 |
| MabLRC58 | 5212167 | 135033 | 85  | 127.09 | 64.07 |
| MabLRC6  | 5088831 | 202142 | 54  | 56.04  | 64.14 |
| MabLRC60 | 5225467 | 120947 | 100 | 69.00  | 64.05 |
| MabLRC62 | 5058382 | 115201 | 120 | 237.02 | 63.87 |
| MabLRC63 | 5082582 | 134168 | 75  | 273.97 | 64.17 |
| MabLRC64 | 5087554 | 115550 | 97  | 328.76 | 64.26 |
| MabLRC65 | 4889317 | 130094 | 71  | 46.30  | 63.97 |
| MabLRC66 | 5071915 | 123700 | 90  | 243.94 | 64.08 |

|           |         |        |     |        |       |
|-----------|---------|--------|-----|--------|-------|
| MabLRC67  | 4817453 | 130185 | 62  | 273.36 | 64.26 |
| MabLRC68  | 5089744 | 119418 | 76  | 200.78 | 64.18 |
| MabLRC69  | 4948942 | 135057 | 76  | 254.43 | 64.11 |
| MabLRC7   | 4847313 | 171918 | 57  | 64.23  | 64.20 |
| MabLRC70  | 5076572 | 192223 | 65  | 83.17  | 64.10 |
| MabLRC71  | 5221674 | 117448 | 84  | 92.27  | 64.06 |
| MabLRC72  | 5242664 | 64033  | 131 | 32.16  | 64.03 |
| MabLRC73  | 4864124 | 123610 | 77  | 69.97  | 64.21 |
| MabLRC74  | 5150373 | 160969 | 76  | 185.85 | 64.10 |
| MabLRC75  | 4905398 | 138000 | 70  | 136.58 | 64.20 |
| MabLRC76  | 5241622 | 117742 | 94  | 225.50 | 64.22 |
| MabLRC77  | 4897536 | 146726 | 66  | 42.82  | 64.16 |
| MabLRC78  | 4880230 | 106660 | 97  | 52.54  | 64.04 |
| MabLRC79  | 5104815 | 136736 | 80  | 130.10 | 64.21 |
| MabLRC8   | 5111822 | 282780 | 46  | 79.48  | 64.19 |
| MabLRC80  | 5081060 | 148894 | 74  | 117.21 | 64.12 |
| MabLRC82  | 4903668 | 143555 | 63  | 87.07  | 64.10 |
| MabLRC83  | 5135736 | 301250 | 37  | 103.65 | 64.16 |
| MabLRC86  | 5055429 | 140564 | 77  | 43.00  | 64.08 |
| MabLRC87  | 5097802 | 142528 | 75  | 175.95 | 64.12 |
| MabLRC88  | 4858972 | 119208 | 71  | 34.24  | 64.21 |
| MabLRC89  | 5181849 | 115124 | 92  | 50.07  | 64.12 |
| MabLRC9   | 5136689 | 168734 | 64  | 31.64  | 64.10 |
| MabLRC90  | 4746830 | 97370  | 103 | 52.93  | 64.24 |
| MabLRC91  | 5014995 | 74685  | 148 | 371.01 | 64.27 |
| MabLRC92  | 5562493 | 166842 | 57  | 90.69  | 63.92 |
| MabLRC93  | 5155964 | 104712 | 110 | 51.08  | 64.12 |
| MabLRC94  | 5007247 | 94727  | 100 | 228.11 | 64.28 |
| MabLRC95  | 5220221 | 107188 | 138 | 51.35  | 64.04 |
| MabLRC96  | 5169380 | 107234 | 99  | 62.40  | 64.10 |
| MabLRC98  | 5127161 | 223154 | 49  | 64.67  | 64.14 |
| MabLRC99  | 4914679 | 39045  | 251 | 34.43  | 64.14 |
| MabLRCA1  | 5436859 | 100425 | 101 | 66.72  | 63.99 |
| MabLRCA10 | 4904608 | 378356 | 32  | 234.35 | 64.10 |

|           |         |        |    |        |       |
|-----------|---------|--------|----|--------|-------|
| MabLRCA11 | 5068073 | 112152 | 88 | 47.39  | 64.22 |
| MabLRCA12 | 5448539 | 124992 | 99 | 246.38 | 64.04 |
| MabLRCA13 | 5068829 | 120115 | 70 | 68.60  | 64.22 |
| MabLRCA14 | 4896703 | 130259 | 61 | 140.94 | 64.14 |
| MabLRCA2  | 4968754 | 202412 | 45 | 523.53 | 64.18 |
| MabLRCB1  | 5325297 | 133135 | 83 | 67.40  | 64.03 |
| MabMT10   | 5036670 | 109522 | 88 | 61.68  | 64.15 |
| MabMT11   | 5039187 | 183160 | 60 | 79.66  | 64.15 |
| MabMT19   | 5055126 | 145787 | 62 | 42.04  | 64.27 |
| MabMT37   | 4939260 | 127894 | 77 | 30.27  | 64.20 |
| MabNG     | 4945591 | 118636 | 94 | 38.72  | 64.14 |
| MabYNKW   | 5193773 | 275586 | 49 | 269.45 | 64.27 |

---

**Table S4. Genes associated with the lineage to which all *M. abscessus* with the *erm(41)* T28C sequevar belonged**

| Gene group (by Roary) | Locus tag in Mab18036 | Annotation                            | Sensitivity | Specificity | Bonferroni corrected <i>P</i> value |
|-----------------------|-----------------------|---------------------------------------|-------------|-------------|-------------------------------------|
| group_8487            | Mab18036_2551         | hypothetical protein                  | 94.44       | 99.25       | 5.36E-16                            |
| group_8493            | Mab18036_2561         | hypothetical protein                  | 94.44       | 99.25       | 5.36E-16                            |
| group_5354            | Mab18036_2560         | hypothetical protein                  | 94.44       | 99.25       | 5.36E-16                            |
| group_8494            | Mab18036_2564         | hypothetical protein                  | 94.44       | 99.25       | 5.36E-16                            |
| group_8490            | Mab18036_2556         | hypothetical protein                  | 94.44       | 99.25       | 5.36E-16                            |
| group_8488            | Mab18036_2552         | hypothetical protein                  | 94.44       | 99.25       | 5.36E-16                            |
| group_8492            | Mab18036_2558         | hypothetical protein                  | 94.44       | 99.25       | 5.36E-16                            |
| group_8491            | Mab18036_2557         | hypothetical protein                  | 94.44       | 99.25       | 5.36E-16                            |
| group_8489            | Mab18036_2555         | hypothetical protein                  | 94.44       | 99.25       | 5.36E-16                            |
| group_8486            | Mab18036_2550         | putative phage integrase              | 94.44       | 98.50       | 5.05E-15                            |
| group_5353            | Mab18036_2559         | hypothetical protein                  | 94.44       | 98.50       | 5.05E-15                            |
| group_2170            | Mab18036_3400         | hypothetical protein                  | 94.44       | 98.50       | 5.05E-15                            |
| group_8597            | Mab18036_4520         | hypothetical protein                  | 100.00      | 96.24       | 7.53E-15                            |
| group_2305            | Mab18036_1747         | MFS transporter                       | 100.00      | 96.24       | 7.53E-15                            |
| group_5342            | Mab18036_1750         | hypothetical protein                  | 100.00      | 96.24       | 7.53E-15                            |
| group_8600            | Mab18036_4528         | hypothetical protein                  | 100.00      | 96.24       | 7.53E-15                            |
| group_5340            | Mab18036_1748         | TetR family transcriptional regulator | 100.00      | 96.24       | 7.53E-15                            |
| group_8598            | Mab18036_4523         | hypothetical protein                  | 100.00      | 96.24       | 7.53E-15                            |
| group_5341            | Mab18036_1749         | hypothetical protein                  | 100.00      | 96.24       | 7.53E-15                            |
| group_2268            | Mab18036_4527         | hypothetical protein                  | 100.00      | 96.24       | 7.53E-15                            |
| group_5338            | Mab18036_1175         | aldehyde dehydrogenase                | 88.89       | 99.25       | 3.39E-14                            |

|            |               |                                       |        |       |          |
|------------|---------------|---------------------------------------|--------|-------|----------|
| group_8471 | Mab18036_1174 | amidohydrolase                        | 88.89  | 99.25 | 3.39E-14 |
| group_5337 | Mab18036_1172 | putative membrane protein             | 88.89  | 99.25 | 3.39E-14 |
| group_8470 | Mab18036_1173 | putative conserved membrane protein   | 88.89  | 99.25 | 3.39E-14 |
| group_8472 | Mab18036_1176 | hypothetical protein                  | 88.89  | 99.25 | 3.39E-14 |
| group_2319 | Mab18036_2563 | hypothetical protein                  | 94.44  | 96.99 | 1.74E-13 |
| group_8685 | Mab18036_4787 | hypothetical protein                  | 88.89  | 98.50 | 3.01E-13 |
| group_5389 | Mab18036_4523 | hypothetical protein                  | 100.00 | 93.98 | 3.50E-13 |
| group_9451 | Mab18036_4786 | hypothetical protein                  | 94.44  | 96.24 | 7.62E-13 |
| group_5355 | Mab18036_2562 | hypothetical protein                  | 94.44  | 96.24 | 7.62E-13 |
| group_8250 | Mab18036_4255 | hypothetical protein                  | 94.44  | 95.49 | 2.90E-12 |
| group_5394 | Mab18036_4782 | hypothetical protein                  | 94.44  | 95.49 | 2.90E-12 |
| group_8113 | Mab18036_3336 | hypothetical protein                  | 94.44  | 95.49 | 2.90E-12 |
| group_5385 | Mab18036_4514 | TetR family transcriptional regulator | 100.00 | 92.48 | 2.94E-12 |
| group_3570 | Mab18036_4519 | hypothetical protein                  | 100.00 | 92.48 | 2.94E-12 |
| group_5388 | Mab18036_4521 | hypothetical protein                  | 100.00 | 92.48 | 2.94E-12 |
| group_8595 | Mab18036_4511 | peptidase                             | 100.00 | 92.48 | 2.94E-12 |
| group_5386 | Mab18036_4516 | FAD-dependent oxidoreductase          | 100.00 | 92.48 | 2.94E-12 |
| group_5383 | Mab18036_4508 | hypothetical protein                  | 100.00 | 92.48 | 2.94E-12 |
| group_5384 | Mab18036_4512 | NADPH:quinone reductase               | 100.00 | 92.48 | 2.94E-12 |
| group_5390 | Mab18036_4524 | hypothetical protein                  | 100.00 | 92.48 | 2.94E-12 |
| group_8593 | Mab18036_4509 | TetR family transcriptional regulator | 100.00 | 92.48 | 2.94E-12 |
| group_8594 | Mab18036_4510 | membrane protein                      | 100.00 | 92.48 | 2.94E-12 |
| group_8596 | Mab18036_4513 | hypothetical protein                  | 100.00 | 92.48 | 2.94E-12 |
| group_2264 | Mab18036_4529 | hypothetical protein                  | 100.00 | 91.73 | 7.74E-12 |
| group_3572 | Mab18036_4792 | hypothetical protein                  | 100.00 | 91.73 | 7.74E-12 |



|            |               |                                      |        |       |          |
|------------|---------------|--------------------------------------|--------|-------|----------|
| group_8686 | Mab18036_4788 | hypothetical protein                 | 100.00 | 91.73 | 7.74E-12 |
| group_5207 | Mab18036_4525 | transcriptional regulator            | 100.00 | 91.73 | 7.74E-12 |
| group_8599 | Mab18036_4526 | hypothetical protein                 | 100.00 | 91.73 | 7.74E-12 |
| group_8251 | Mab18036_4263 | hypothetical protein                 | 94.44  | 94.74 | 9.86E-12 |
| group_8710 | Mab18036_4918 | hypothetical protein                 | 83.33  | 98.50 | 1.20E-11 |
| group_2258 | Mab18036_4517 | putative oxidoreductase              | 88.89  | 96.24 | 3.83E-11 |
| group_3492 | Mab18036_4779 | hypothetical protein                 | 88.89  | 96.24 | 3.83E-11 |
| group_5205 | Mab18036_4778 | hypothetical protein                 | 88.89  | 95.49 | 1.39E-10 |
| nasC       | Mab18036_4780 | FAD/NAD(P)-binding<br>oxidoreductase | 100.00 | 88.72 | 2.32E-10 |
| nasA       | Mab18036_4781 | molybdopterin oxidoreductase         | 100.00 | 88.72 | 2.32E-10 |
| group_7970 | Mab18036_4783 | hypothetical protein                 | 100.00 | 87.97 | 4.93E-10 |
| group_1156 | Mab18036_4785 | hypothetical protein                 | 94.44  | 91.73 | 5.94E-10 |
| group_1607 | Mab18036_4793 | hypothetical protein                 | 94.44  | 91.73 | 5.94E-10 |
| group_5203 | Mab18036_4784 | hypothetical protein                 | 94.44  | 91.73 | 5.94E-10 |
| group_8695 | Mab18036_4865 | hypothetical protein                 | 83.33  | 96.24 | 1.28E-09 |
| group_530  | Mab18036_4859 | hypothetical protein                 | 83.33  | 96.24 | 1.28E-09 |
| group_8694 | Mab18036_4856 | hypothetical protein                 | 83.33  | 96.24 | 1.28E-09 |
| group_8692 | Mab18036_4854 | hypothetical protein                 | 83.33  | 96.24 | 1.28E-09 |
| group_2231 | Mab18036_4919 | hypothetical protein                 | 83.33  | 96.24 | 1.28E-09 |
| group_3578 | Mab18036_4957 | hypothetical protein                 | 83.33  | 96.24 | 1.28E-09 |
| group_8693 | Mab18036_4855 | hypothetical protein                 | 83.33  | 96.24 | 1.28E-09 |
| group_5253 | Mab18036_3337 | hypothetical protein                 | 94.44  | 90.98 | 1.42E-09 |

854 **Supplemental References**

- 855 1. Ripoll F, Pasek S, Schenowitz C, Dossat C, Barbe V, Rottman M, Macheras E, Heym  
856 B, Hermann JL, Daffé M, Brosch R, Risler JL, Gaillard JL. Non mycobacterial  
857 virulence genes in the genome of the emerging pathogen *Mycobacterium abscessus*.  
858 *PLoS One* 2009;4:e5660.
- 859 2. Sekizuka T, Kai M, Nakanaga K, Nakata N, Kazumi Y, Maeda S, Makino M, Hoshino  
860 Y, Kuroda M. Complete genome sequence and comparative genomic analysis of  
861 *Mycobacterium massiliense* JCM 15300 in the *Mycobacterium abscessus* group reveal  
862 a conserved genomic island MmGI-1 related to putative lipid metabolism. *PLoS One*  
863 2014;9:e114848.
- 864 3. Yoshida M, Fukano H, Miyamoto Y, Shibayama K, Suzuki M, Hoshino Y. Complete  
865 genome sequence of a type strain of *Mycobacterium abscessus* subsp. *bolletii*, a  
866 member of the *Mycobacterium abscessus* complex. *Genome Announc*  
867 2018;6(5):e01530-17.
- 868 4. Tanizawa Y, Fujisawa T, Nakamura Y. DFAST: a flexible prokaryotic genome  
869 annotation pipeline for faster genome publication. *Bioinformatics* 2018;34:1037–1039.
- 870 5. Page AJ, Cummins CA, Hunt M, Wong VK, Reuter S, Holden MTG, Fookes M,  
871 Falush D, Keane JA, Parkhill J. Roary: rapid large-scale prokaryote pan genome  
872 analysis. *Bioinformatics* 2015;31:3691–3693.

- 873 6. Stamatakis A. RAxML-VI-HPC: maximum likelihood-based phylogenetic analyses  
874 with thousands of taxa and mixed models. *Bioinformatics* 2006;22:2688–2690.
- 875 7. Jain C, Rodriguez-R LM, Phillippy AM, Konstantinidis KT, Aluru S. High throughput  
876 ANI analysis of 90K prokaryotic genomes reveals clear species boundaries. *Nat*  
877 *Commun* 2018;9:1–8.
- 878 8. Kurtz S, Phillippy A, Delcher AL, Smoot M, Shumway M, Antonescu C, Salzberg SL.  
879 Versatile and open software for comparing large genomes. *Genome Biol* 2004;5:.
- 880 9. Shen W, Le S, Li Y, Hu F. SeqKit: A Cross-Platform and Ultrafast Toolkit for  
881 FASTA/Q File Manipulation. *PLoS One* 2016;11:e0163962.
- 882 10. Brynildsrud O, Bohlin J, Scheffer L, Eldholm V. Rapid scoring of genes in microbial  
883 pan-genome-wide association studies with Scoary. *Genome Biol* 2016;17:238.
- 884 11. Nakanaga K, Sekizuka T, Fukano H, Sakakibara Y, Takeuchi F, Wada S, Ishii N,  
885 Makino M, Kuroda M, Hoshino Y. Discrimination of *Mycobacterium abscessus* subsp.  
886 *massiliense* from *Mycobacterium abscessus* subsp. *abscessus* in clinical isolates by  
887 multiplex PCR. *J Clin Microbiol* 2014;52:251–9.
- 888 12. Macheras E, Konjek J, Roux AL, Thiberge JM, Bastian S, Leão SC, Palaci M,  
889 Sivadon-Tardy V, Gutierrez C, Richter E, Rüsç-Gerdes S, Pfyffer GE, Bodmer T,  
890 Jarlier V, Cambau E, Brisse S, Caro V, Rastogi N, Gaillard JL, Heym B. Multilocus

*Manuscript for bioRxiv*  
*M. Yoshida et al.*

891 sequence typing scheme for the *Mycobacterium abscessus* complex. *Res Microbiol*

892 2014;165:82–90.

893

894 Supplemental Figures

895 Figure S1.

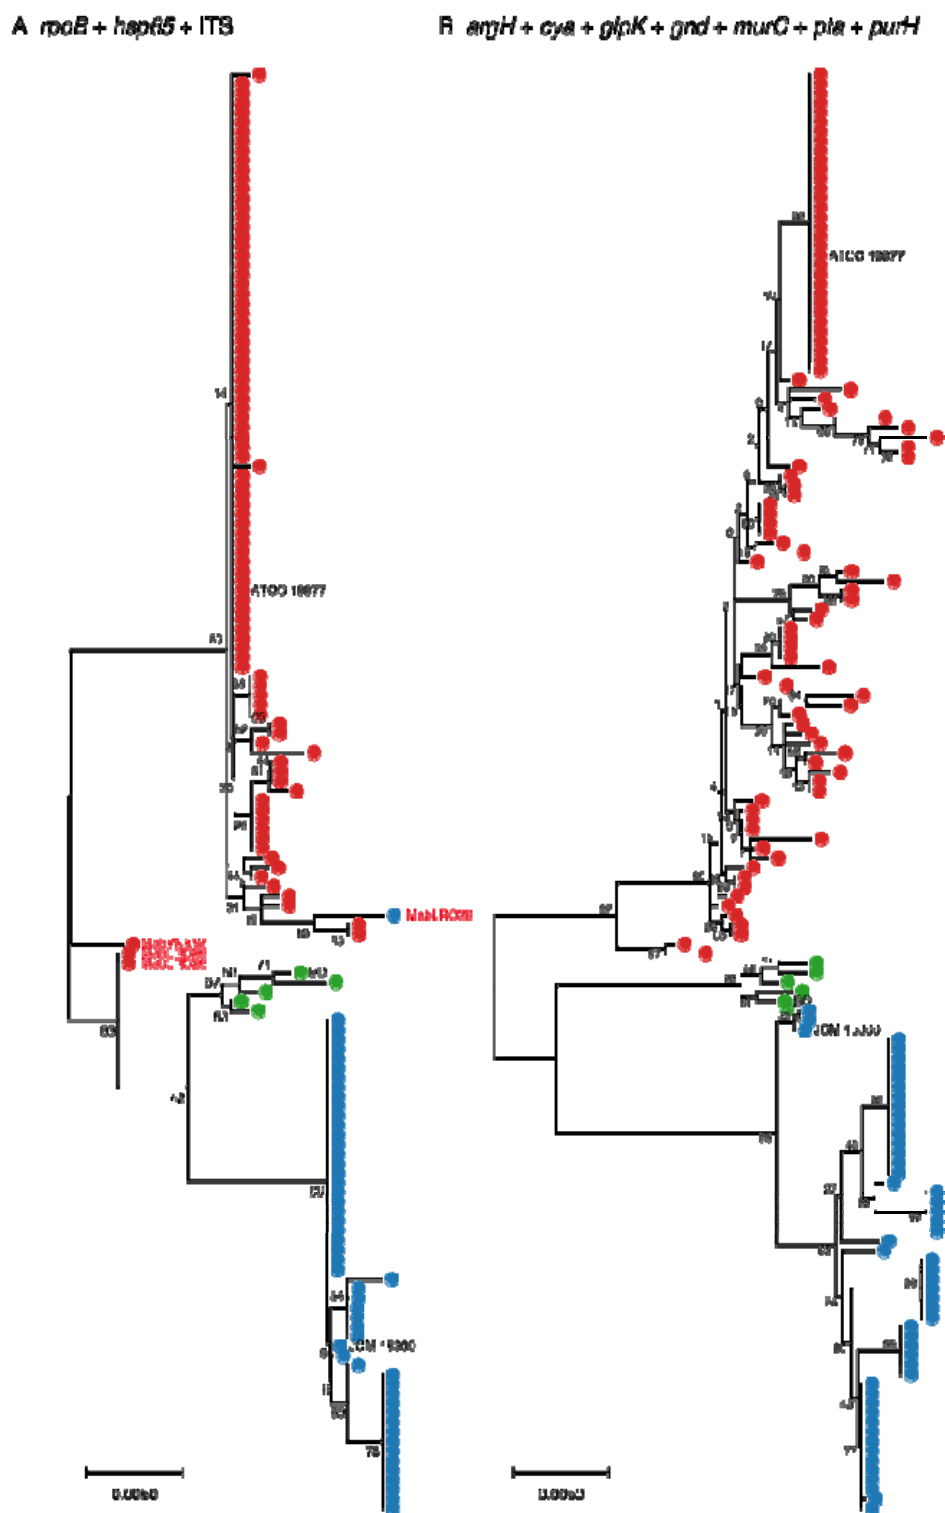

896

897

898 **Figure S2.**

899

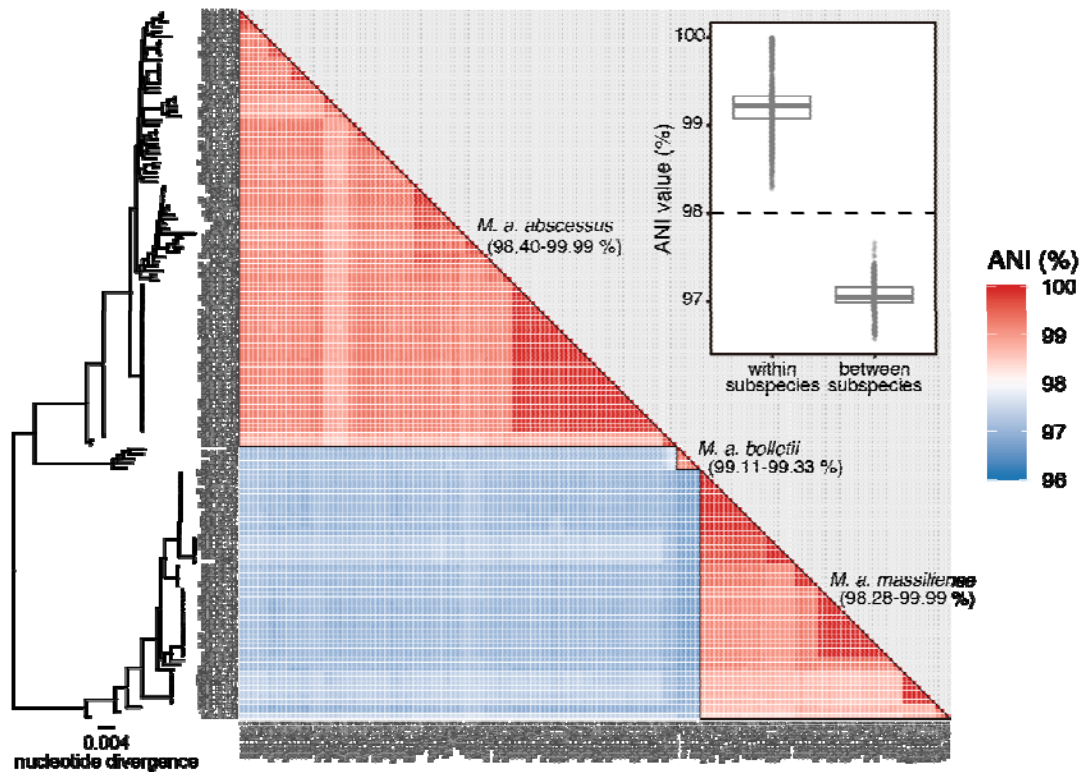

900

901



905 **Figure S4.**

906

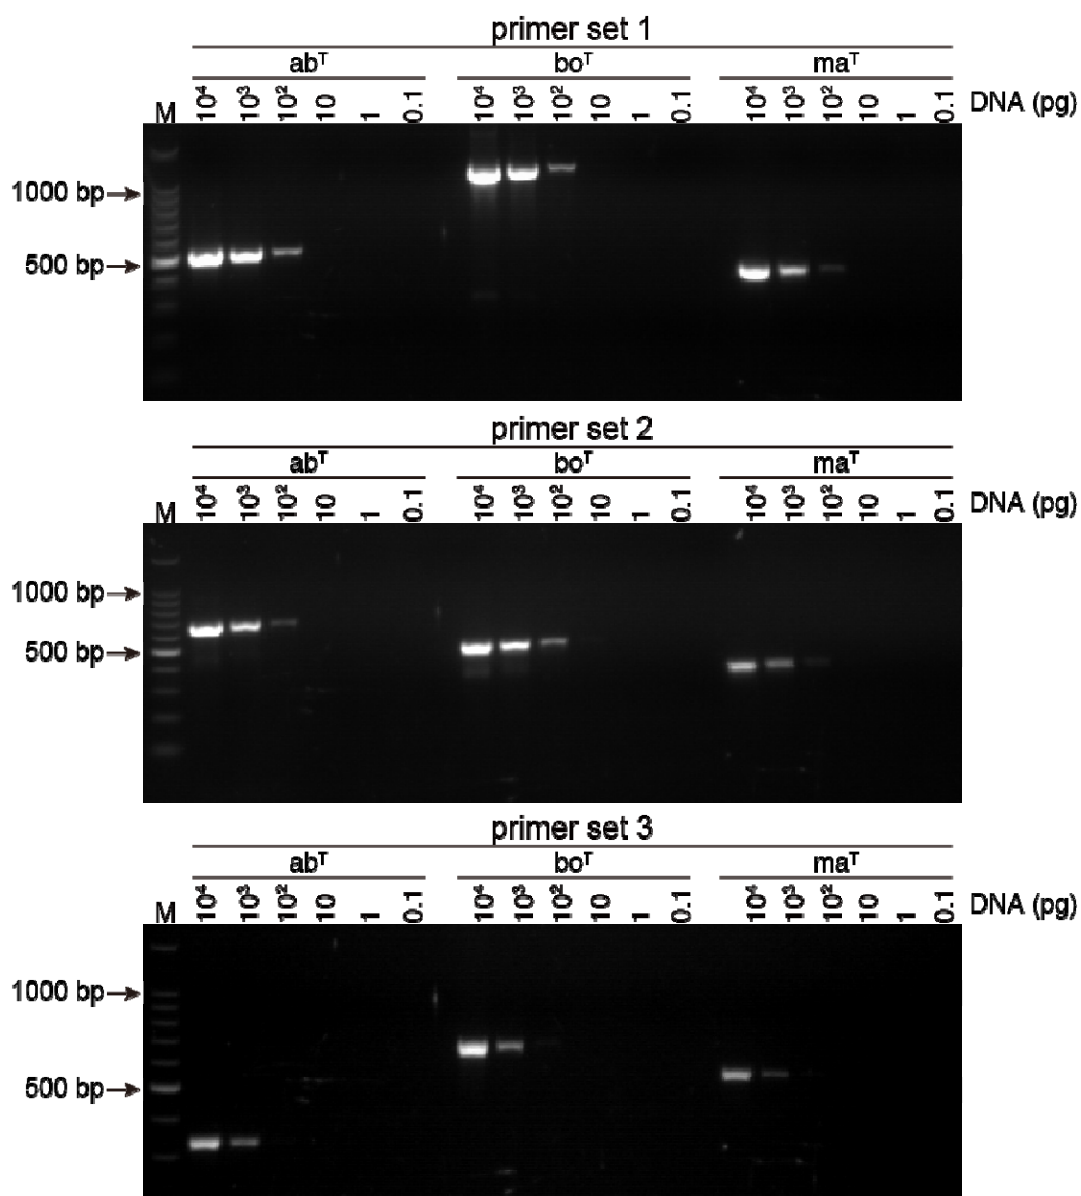

907

908



909 **Figure S5.**

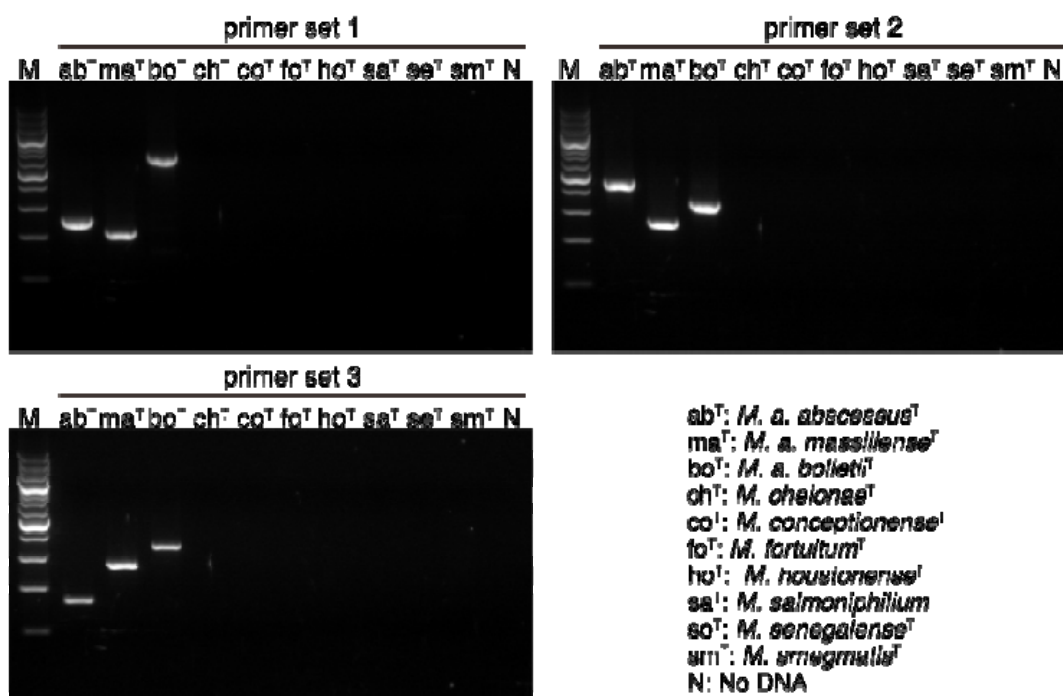

910

911

912 **Figure S6.**

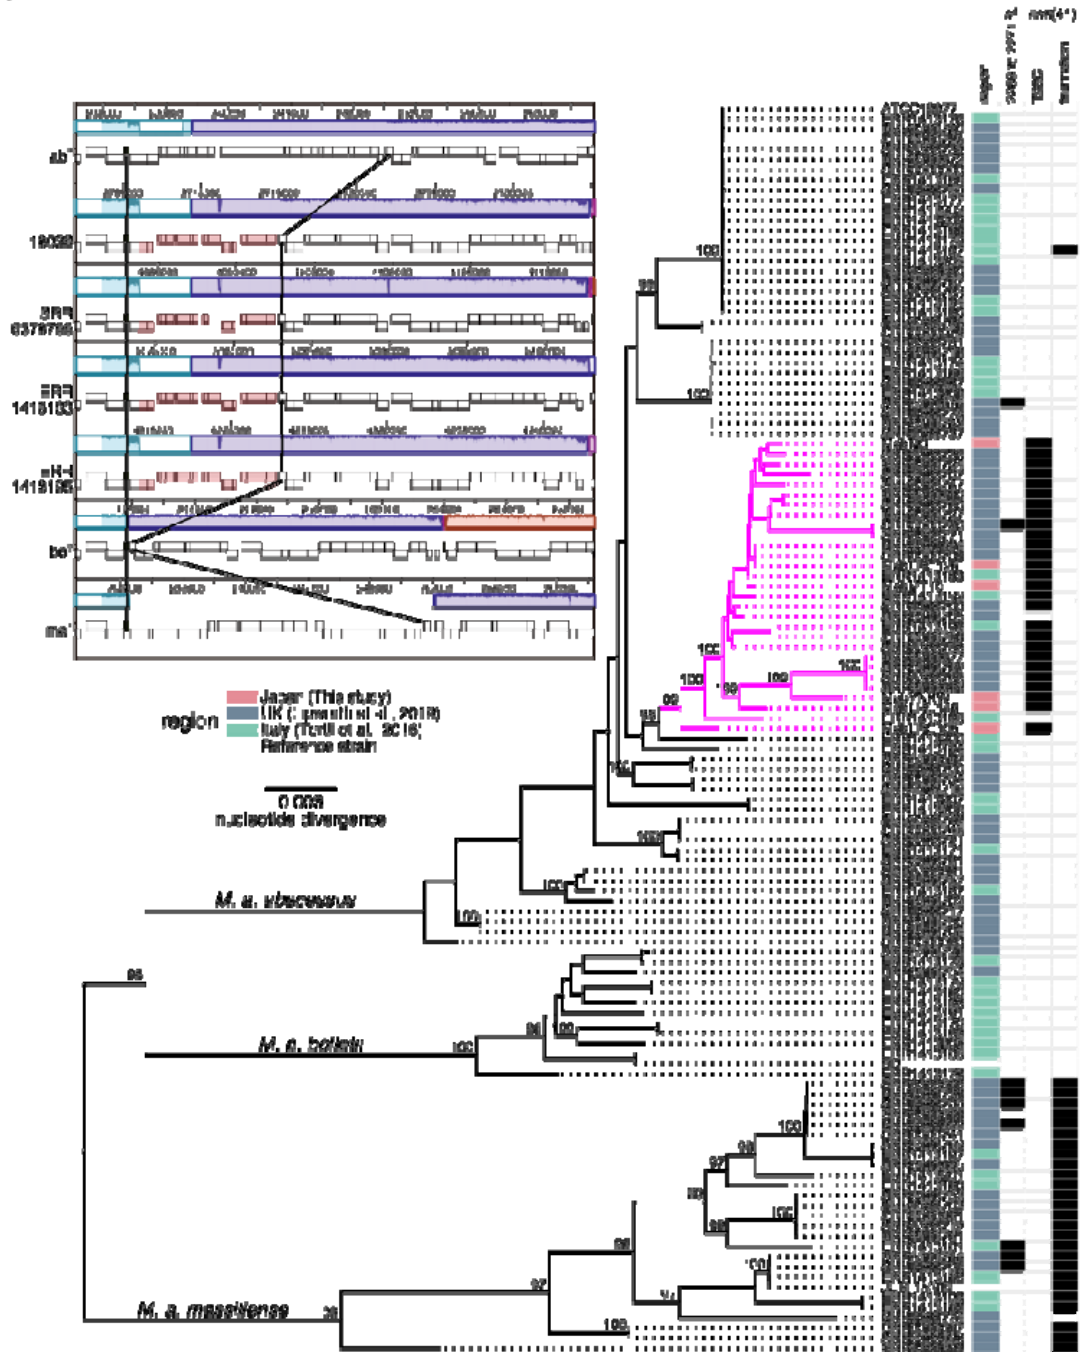

913

914



919 **Figure S8.**

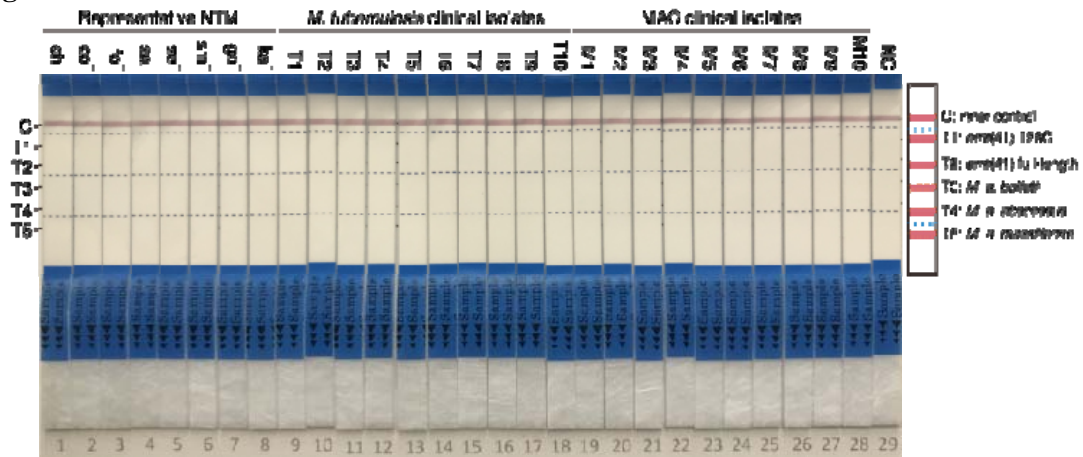

920

921

922

923

924
